# Supplementary material for: CAPRAM reduction towards an operational multiphase halogen and DMS chemistry treatment in the chemistry transport model COSMO-MUSCAT(5.04e)
Source: Copernicus journal article supplement (doi:10.5194/gmd-2019-322), 2020-01-23
Supplement: Supplementary file 1 [file gmd-2019-322-supplement.pdf]

1 **Supporting information for:**  
2 **CAPRAM reduction towards an operational multiphase halogen**  
3 **and DMS chemistry treatment in the chemistry transport model**  
4 **COSMO-MUSCAT(5.04e)**

5  
6 Erik H. Hoffmann<sup>1</sup>, Roland Schrödner<sup>2</sup>, Andreas Tilgner<sup>1</sup>, Ralf Wolke<sup>2</sup>, Hartmut Herrmann<sup>1</sup>

7  
8 <sup>1</sup> Atmospheric Chemistry Department (ACD), Leibniz Institute for Tropospheric Research (TROPOS),  
9 Permoserstr. 15, 04318 5 Leipzig, Germany

10 <sup>2</sup> Modeling of Atmospheric Processes Department (MAPD), Leibniz Institute for Tropospheric Research (TROPOS),  
11 Permoserstr. 15, 04318 Leipzig, 04318, Germany

12  
13  
14 *Correspondence to:* Hartmut Herrmann (herrmann@tropos.de)

15 Number of pages: 23

16 Tables: 11

**Table S1** Implemented dry deposition, initial concentrations, and emission rates of chemical species for the open ocean simulation with COSMO-MUSCAT

| Specie                            | Dry deposition / s <sup>-1</sup> | Initial concentration / molecules cm <sup>-3</sup> | Emission rates / mol m <sup>-2</sup> s <sup>-1</sup> | Aerosol initial concentration / mol m <sup>-3</sup> |
|-----------------------------------|----------------------------------|----------------------------------------------------|------------------------------------------------------|-----------------------------------------------------|
| NH <sub>3</sub>                   | 1.0·10 <sup>-2</sup>             | 1.28·10 <sup>9</sup>                               | 7.589·10 <sup>-10</sup>                              |                                                     |
| NO                                | 2.0·10 <sup>-4</sup>             | 2.50·10 <sup>8</sup>                               | 4.151·10 <sup>-12</sup>                              |                                                     |
| NO <sub>2</sub>                   | 2.0·10 <sup>-4</sup>             | 5.00·10 <sup>8</sup>                               |                                                      |                                                     |
| NO <sub>3</sub>                   | 1.0·10 <sup>-2</sup>             |                                                    |                                                      |                                                     |
| N <sub>2</sub> O <sub>5</sub>     | 1.0·10 <sup>-2</sup>             |                                                    |                                                      |                                                     |
| HONO                              |                                  | 2.50·10 <sup>8</sup>                               |                                                      |                                                     |
| HNO <sub>3</sub>                  | 7.0·10 <sup>-3</sup>             | 2.00·10 <sup>9</sup>                               |                                                      |                                                     |
| HO <sub>2</sub> NO <sub>2</sub>   | 5.0·10 <sup>-3</sup>             |                                                    |                                                      |                                                     |
| O <sub>3</sub>                    | 1.5·10 <sup>-3</sup>             | 7.50·10 <sup>11</sup>                              |                                                      |                                                     |
| CO                                | 1.0·10 <sup>-3</sup>             | 4.25·10 <sup>12</sup>                              | 1.416·10 <sup>-9</sup>                               |                                                     |
| CO <sub>2</sub>                   |                                  | 1.02·10 <sup>16</sup>                              |                                                      |                                                     |
| SO <sub>2</sub>                   | 8.7·10 <sup>-3</sup>             | 2.55·10 <sup>9</sup>                               |                                                      |                                                     |
| SULF                              | 1.0·10 <sup>-2</sup>             |                                                    |                                                      |                                                     |
| H <sub>2</sub>                    |                                  | 1.28·10 <sup>13</sup>                              |                                                      |                                                     |
| H <sub>2</sub> O <sub>2</sub>     | 5.0·10 <sup>-3</sup>             | 1.50·10 <sup>10</sup>                              |                                                      |                                                     |
| CH <sub>4</sub>                   |                                  | 4.50·10 <sup>13</sup>                              | 2.923·10 <sup>-11</sup>                              |                                                     |
| C <sub>2</sub> H <sub>6</sub>     |                                  | 1.28·10 <sup>10</sup>                              | 1.661·10 <sup>-13</sup>                              |                                                     |
| C <sub>3</sub> H <sub>8</sub>     |                                  | 2.31·10 <sup>10</sup>                              | 3.321·10 <sup>-13</sup>                              |                                                     |
| C <sub>2</sub> H <sub>2</sub>     |                                  | 2.42·10 <sup>9</sup>                               | 1.661·10 <sup>-13</sup>                              |                                                     |
| C <sub>2</sub> H <sub>4</sub>     |                                  | 2.55·10 <sup>9</sup>                               | 3.985·10 <sup>-12</sup>                              |                                                     |
| C <sub>3</sub> H <sub>6</sub>     |                                  |                                                    | 1.661·10 <sup>-12</sup>                              |                                                     |
| BIGENE                            |                                  | 9.50·10 <sup>8</sup>                               |                                                      |                                                     |
| HCHO                              | 5.0·10 <sup>-3</sup>             | 5.00·10 <sup>9</sup>                               | 2.956·10 <sup>-14</sup>                              |                                                     |
| CH <sub>3</sub> CHO               |                                  | 1.40·10 <sup>8</sup>                               | 1.513·10 <sup>-10</sup>                              |                                                     |
| C <sub>2</sub> H <sub>5</sub> CHO |                                  | 5.13·10 <sup>9</sup>                               | 9.083·10 <sup>-11</sup>                              |                                                     |
| HYAC                              |                                  | 3.83·10 <sup>8</sup>                               | 4.151·10 <sup>-12</sup>                              |                                                     |
| CH <sub>3</sub> COCH <sub>3</sub> |                                  | 1.10·10 <sup>10</sup>                              | 6.320·10 <sup>-12</sup>                              |                                                     |
| MEK                               |                                  | 6.89·10 <sup>8</sup>                               | 7.124·10 <sup>-16</sup>                              |                                                     |
| GLYOXAL                           |                                  | 2.55·10 <sup>8</sup>                               |                                                      |                                                     |

| Specie                              | Dry deposition / s <sup>-1</sup> | Initial concentration / molecules cm <sup>-3</sup> | Emission rates / mol m <sup>-2</sup> s <sup>-1</sup> | Aerosol initial concentration / mol m <sup>-3</sup> |
|-------------------------------------|----------------------------------|----------------------------------------------------|------------------------------------------------------|-----------------------------------------------------|
| CH <sub>3</sub> COCHO               |                                  | 2.55·10 <sup>8</sup>                               |                                                      |                                                     |
| CH <sub>3</sub> OOH                 | 2.5·10 <sup>-3</sup>             | 5.00·10 <sup>9</sup>                               |                                                      |                                                     |
| CH <sub>3</sub> CH <sub>2</sub> OOH |                                  | 2.55·10 <sup>9</sup>                               |                                                      |                                                     |
| CH <sub>3</sub> COOOH               |                                  | 2.55·10 <sup>7</sup>                               |                                                      |                                                     |
| PAN                                 | 1.0·10 <sup>-4</sup>             | 2.50·10 <sup>8</sup>                               |                                                      |                                                     |
| CH <sub>3</sub> OH                  | 1.0·10 <sup>-2</sup>             | 1.40·10 <sup>10</sup>                              | 9.797·10 <sup>-16</sup>                              |                                                     |
| CH <sub>3</sub> CH <sub>2</sub> OH  | 5.0·10 <sup>-3</sup>             | 2.00·10 <sup>9</sup>                               | 1.015·10 <sup>-11</sup>                              |                                                     |
| HCOOH                               | 1.0·10 <sup>-2</sup>             | 6.25·10 <sup>9</sup>                               |                                                      |                                                     |
| CH <sub>3</sub> COOH                |                                  | 5.00·10 <sup>9</sup>                               | 1.278·10 <sup>-12</sup>                              |                                                     |
| C <sub>5</sub> H <sub>8</sub>       |                                  | 1.28·10 <sup>9</sup>                               | 2.341·10 <sup>-12</sup>                              |                                                     |
| APIN                                |                                  | 4.53·10 <sup>8</sup>                               | 2.541·10 <sup>-14</sup>                              |                                                     |
| BPIN                                |                                  | 3.02·10 <sup>8</sup>                               |                                                      |                                                     |
| CHBr <sub>3</sub>                   |                                  | 3.83·10 <sup>7</sup>                               | 2.225·10 <sup>-13</sup>                              |                                                     |
| C <sub>3</sub> H <sub>7</sub> I     |                                  | 1.63·10 <sup>7</sup>                               | 8.170·10 <sup>-15</sup>                              |                                                     |
| CH <sub>2</sub> I <sub>2</sub>      |                                  | 2.55·10 <sup>5</sup>                               | 1.876·10 <sup>-13</sup>                              |                                                     |
| CH <sub>3</sub> I                   |                                  | 2.04·10 <sup>7</sup>                               | 2.458·10 <sup>-13</sup>                              |                                                     |
| CH <sub>2</sub> ClI                 |                                  | 2.55·10 <sup>5</sup>                               | 1.524·10 <sup>-13</sup>                              |                                                     |
| CH <sub>2</sub> BrI                 |                                  | 8.93·10 <sup>5</sup>                               | 8.751·10 <sup>-14</sup>                              |                                                     |
| HCl                                 | 2.0·10 <sup>-2</sup>             | 2.50·10 <sup>9</sup>                               |                                                      |                                                     |
| HOCl                                | 2.0·10 <sup>-3</sup>             |                                                    |                                                      |                                                     |
| ClNO <sub>2</sub>                   | 1.0·10 <sup>-2</sup>             |                                                    |                                                      |                                                     |
| ClNO <sub>3</sub>                   | 1.0·10 <sup>-2</sup>             |                                                    |                                                      |                                                     |
| HBr                                 | 2.0·10 <sup>-2</sup>             |                                                    |                                                      |                                                     |
| HOBr                                | 1.6·10 <sup>-3</sup>             |                                                    |                                                      |                                                     |
| BrNO <sub>2</sub>                   | 1.0·10 <sup>-2</sup>             |                                                    |                                                      |                                                     |
| BrNO <sub>3</sub>                   | 5.0·10 <sup>-3</sup>             |                                                    |                                                      |                                                     |
| I <sub>2</sub>                      |                                  |                                                    | 1.744·10 <sup>-14</sup>                              |                                                     |
| HOI                                 | 1.0·10 <sup>-2</sup>             |                                                    | 3.321·10 <sup>-13</sup>                              |                                                     |
| INO <sub>3</sub>                    | 1.0·10 <sup>-2</sup>             |                                                    |                                                      |                                                     |
| I <sub>2</sub> O <sub>2</sub>       | 1.0·10 <sup>-2</sup>             |                                                    |                                                      |                                                     |
| I <sub>2</sub> O <sub>3</sub>       | 1.0·10 <sup>-2</sup>             |                                                    |                                                      |                                                     |

| Specie                                      | Dry deposition / s <sup>-1</sup> | Initial concentration / molecules cm <sup>-3</sup> | Emission rates / mol m <sup>-2</sup> s <sup>-1</sup> | Aerosol initial concentration / mol m <sup>-3</sup> |
|---------------------------------------------|----------------------------------|----------------------------------------------------|------------------------------------------------------|-----------------------------------------------------|
| I <sub>2</sub> O <sub>4</sub>               | 1.0·10 <sup>-2</sup>             | 1.53·10 <sup>9</sup>                               | 1.026·10 <sup>-10</sup>                              |                                                     |
| DMS                                         |                                  |                                                    |                                                      |                                                     |
| DMSO                                        | 5.0·10 <sup>-3</sup>             |                                                    |                                                      |                                                     |
| DMSO <sub>2</sub>                           | 5.0·10 <sup>-3</sup>             |                                                    |                                                      |                                                     |
| MSA                                         | 5.0·10 <sup>-3</sup>             |                                                    |                                                      |                                                     |
| SO <sub>4</sub> <sup>2-</sup>               |                                  |                                                    |                                                      | 1.05·10 <sup>-8</sup>                               |
| NO <sub>3</sub> <sup>-</sup>                |                                  |                                                    |                                                      | 2.05·10 <sup>-9</sup>                               |
| Cl <sup>-</sup>                             |                                  |                                                    |                                                      | 9.76·10 <sup>-8</sup>                               |
| Br <sup>-</sup>                             |                                  |                                                    |                                                      | 2.14·10 <sup>-10</sup>                              |
| NH <sub>4</sub> <sup>+</sup>                |                                  |                                                    |                                                      | 5.72·10 <sup>-9</sup>                               |
| Mn <sup>3+</sup>                            |                                  |                                                    |                                                      | 3.93·10 <sup>-15</sup>                              |
| Fe <sup>3+</sup>                            |                                  |                                                    |                                                      | 4.80·10 <sup>-15</sup>                              |
| Cu <sup>2+</sup>                            |                                  |                                                    |                                                      | 1.72·10 <sup>-13</sup>                              |
| HC <sub>2</sub> O <sub>4</sub> <sup>-</sup> |                                  |                                                    |                                                      | 3.94·10 <sup>-11</sup>                              |
| MSA                                         |                                  |                                                    |                                                      | 3.26·10 <sup>-10</sup>                              |
| H <sup>+</sup>                              |                                  |                                                    |                                                      | 1.00·10 <sup>-11</sup>                              |

**Table S2** Implemented gas-phase reactions in the CAPRAM-DM1.0red.

| Nr. | Reaction                                                                                                                                                       | Rate constant <sup>(a)</sup>            | Comment |
|-----|----------------------------------------------------------------------------------------------------------------------------------------------------------------|-----------------------------------------|---------|
| D1  | $\text{DMS} + \text{OH} \rightarrow \text{CH}_3\text{SCH}_2\text{O}_2 - \text{O}_2$                                                                            | $k = 1.12 \cdot 10^{-11} \exp(-250/T)$  |         |
| D2  | $\text{DMS} + \text{OH} \rightarrow 0.9 \text{DMSO} + 0.9 \text{HO}_2 + 0.1 \text{CH}_3\text{SOH} + 0.1 \text{CH}_3\text{O}_2 - \text{O}_2$                    | (1)                                     |         |
| D3  | $\text{DMS} + \text{NO}_3 \rightarrow \text{CH}_3\text{SCH}_2\text{O}_2 - \text{O}_2$                                                                          | $k = 1.90 \cdot 10^{-13} \exp(520/T)$   |         |
| D4  | $\text{DMS} + \text{Cl} \rightarrow 0.82 \text{CH}_3\text{SCH}_2\text{O}_2 + 0.82 \text{HCl} + 0.18 \text{DMSO} + 0.18 \text{ClO} - \text{O}_2$                | $k = 1.88 \cdot 10^{-10}$               |         |
| D5  | $\text{DMS} + \text{ClO} \rightarrow 0.73 \text{Cl} + 0.73 \text{DMSO} + 0.27 \text{HOCl} + 0.27 \text{CH}_3\text{SCH}_2\text{O}_2 - 0.27 \text{O}_2$          | $k = 1.70 \cdot 10^{-15} \exp(340/T)$   |         |
| D6  | $\text{DMS} + \text{BrO} \rightarrow \text{DMSO} + \text{Br}$                                                                                                  | $k = 1.50 \cdot 10^{-14} \exp(1000/T)$  |         |
| D7  | $\text{DMS} + \text{Cl}_2 \rightarrow \text{CH}_3\text{SCH}_2\text{Cl} + \text{HCl}$                                                                           | $k = 3.40 \cdot 10^{-14}$               |         |
| D8  | $\text{DMS} + \text{IO} \rightarrow \text{DMSO} + \text{I}$                                                                                                    | $k = 3.30 \cdot 10^{-13} \exp(-925/T)$  |         |
| D9  | $\text{CH}_3\text{SCH}_2\text{O}_2 + \text{HO}_2 \rightarrow \text{CH}_3\text{SCH}_2\text{OOH} + \text{O}_2$                                                   | $k = 1.13 \cdot 10^{-13} \exp(1300/T)$  |         |
| D10 | $\text{CH}_3\text{SCH}_2\text{O}_2 + \text{NO} \rightarrow \text{CH}_3\text{S} + \text{HCHO} + \text{NO}_2$                                                    | $k = 4.90 \cdot 10^{-12} \exp(260/T)$   |         |
| D11 | $\text{CH}_3\text{SCH}_2\text{O}_2 + \text{NO}_3 \rightarrow \text{CH}_3\text{S} + \text{HCHO} + \text{NO}_2 + \text{O}_2$                                     | $k = 2.30 \cdot 10^{-12}$               |         |
| D12 | $\text{CH}_3\text{SCH}_2\text{O}_2 + \text{CH}_3\text{O}_2 \rightarrow 0.89 \text{CH}_3\text{S} + 0.89 \text{HCHO} + 0.11 \text{CH}_3\text{SCHO} + \text{O}_2$ | $k = 5.00 \cdot 10^{-13} \exp(400/T)$   |         |
| D13 | $\text{CH}_3\text{SCH}_2\text{Cl} + \text{OH} \rightarrow \text{CH}_3\text{SOH} + \text{ClCH}_2\text{O}_2 - \text{O}_2$                                        | $k = 2.50 \cdot 10^{-12}$               |         |
| D14 | $\text{CH}_3\text{SCH}_2\text{OOH} + \text{OH} \rightarrow \text{CH}_3\text{SCHO} + \text{OH} + \text{H}_2\text{O}$                                            | $k = 7.03 \cdot 10^{-11}$               |         |
| D15 | $\text{CH}_3\text{SCHO} + \text{OH} \rightarrow \text{CH}_3\text{S} + \text{CO} + \text{H}_2\text{O}$                                                          | $k = 1.11 \cdot 10^{-11}$               |         |
| D16 | $\text{DMSO} + \text{OH} \rightarrow \text{MSIA} + \text{CH}_3\text{O}_2 - \text{O}_2$                                                                         | $k = 6.10 \cdot 10^{-12} \exp(800/T)$   |         |
| D17 | $\text{DMSO} + \text{NO}_3 \rightarrow \text{DMSO}_2 + \text{NO}_2$                                                                                            | $k = 2.90 \cdot 10^{-13}$               |         |
| D18 | $\text{DMSO} + \text{Cl} \rightarrow 0.43 \text{DMSO}_2 + 0.43 \text{ClO} + 0.57 \text{CH}_3\text{SO} + 0.57 \text{HCHO} + \text{HCl} - 0.43 \text{O}_2$       | $k = 1.45 \cdot 10^{-11}$               |         |
| D19 | $\text{DMSO} + \text{BrO} \rightarrow \text{CH}_3\text{SO}_2\text{CH}_3 + \text{Br}$                                                                           | $k = 1.00 \cdot 10^{-14}$               |         |
| D20 | $\text{CH}_3\text{SOH} + \text{OH} \rightarrow \text{CH}_3\text{SO} + \text{H}_2\text{O}$                                                                      | $k = 5.00 \cdot 10^{-11}$               |         |
| D21 | $\text{CH}_3\text{S} + \text{O}_3 \rightarrow \text{CH}_3\text{SO} + \text{O}_2$                                                                               | $k = 1.15 \cdot 10^{-12} \exp(430/T)$   |         |
| D22 | $\text{CH}_3\text{S} + \text{O}_2 \rightarrow \text{CH}_3\text{O}_2 + \text{SO}_2 - \text{O}_2$                                                                | (2)                                     |         |
| D23 | $\text{CH}_3\text{S} + \text{O}_2 \rightarrow \text{CH}_3\text{SO}_2$                                                                                          | (3)                                     |         |
| D24 | $\text{MSIA} + \text{OH} \rightarrow \text{CH}_3\text{O}_2 + \text{SO}_2 + \text{H}_2\text{O} - \text{O}_2$                                                    | $k = 9.00 \cdot 10^{-11}$               |         |
| D25 | $\text{CH}_3\text{SO} + \text{O}_3 \rightarrow \text{CH}_3\text{O}_2 + \text{SO}_2$                                                                            | $k = 4.00 \cdot 10^{-13}$               |         |
| D26 | $\text{CH}_3\text{SO}_2 + \text{O}_3 \rightarrow \text{CH}_3\text{SO}_3 + \text{O}_2$                                                                          | $k = 3.00 \cdot 10^{-13}$               |         |
| D27 | $\text{CH}_3\text{SO}_2 \rightarrow \text{CH}_3\text{O}_2 + \text{SO}_2 - \text{O}_2$                                                                          | $k = 5.00 \cdot 10^{+13} \exp(-9673/T)$ |         |

| Nr.                                                                                                                                                                                                                                                                                                                                           | Reaction                                                                                                    | Rate constant <sup>(a)</sup>                                           | Comment |
|-----------------------------------------------------------------------------------------------------------------------------------------------------------------------------------------------------------------------------------------------------------------------------------------------------------------------------------------------|-------------------------------------------------------------------------------------------------------------|------------------------------------------------------------------------|---------|
| D28                                                                                                                                                                                                                                                                                                                                           | CH <sub>3</sub> SO <sub>3</sub> + HO <sub>2</sub> → MSA + O <sub>2</sub>                                    | k = 5.00·10 <sup>-11</sup>                                             |         |
| D29                                                                                                                                                                                                                                                                                                                                           | CH <sub>3</sub> SO <sub>3</sub> → CH <sub>3</sub> O <sub>2</sub> + SULF – H <sub>2</sub> O – O <sub>2</sub> | k = 5.00·10 <sup>+13</sup> exp(-9946/T)                                |         |
| <b>Photolysis reactions</b>                                                                                                                                                                                                                                                                                                                   |                                                                                                             |                                                                        |         |
| D30                                                                                                                                                                                                                                                                                                                                           | CH <sub>3</sub> SCH <sub>2</sub> OOH → CH <sub>3</sub> S + HCHO + OH                                        | J = 7.649·10 <sup>-06</sup> cos(χ) <sup>0.682</sup> exp(-0.279/cos(χ)) |         |
| D31                                                                                                                                                                                                                                                                                                                                           | CH <sub>3</sub> SCHO → CH <sub>3</sub> S + CO + HO <sub>2</sub> - O <sub>2</sub>                            | J = 2.792·10 <sup>-05</sup> cos(χ) <sup>0.805</sup> exp(-0.338/cos(χ)) |         |
| D32                                                                                                                                                                                                                                                                                                                                           | CH <sub>3</sub> SCH <sub>2</sub> Cl → CH <sub>3</sub> S + ClCH <sub>2</sub> O <sub>2</sub> - O <sub>2</sub> | J = 1.458·10 <sup>-04</sup> cos(χ) <sup>0.314</sup> exp(-0.641/cos(χ)) |         |
| (a) k <sup>2nd</sup> in cm <sup>3</sup> molecules <sup>-1</sup> s <sup>-1</sup> ; k <sup>1st</sup> in s <sup>-1</sup> ; J in s <sup>-1</sup> ;                                                                                                                                                                                                |                                                                                                             |                                                                        |         |
| (1) $k = \frac{k_1 \times k_3}{k_2 + k_3}$ with $k_1 = \frac{9.5 \times 10^{-39} \times [\text{O}_2] \times e^{5270/T}}{1 + 7.5 \times 10^{-29} \times [\text{O}_2] \times e^{5610/T}}$ ; $k_2 = \frac{2.05 \times 10^{-14} \times [\text{O}_2] \times e^{2674/T}}{(1 + 5.5 \times 10^{-31} \times [\text{O}_2] \times e^{7460/T}) \times T}$ |                                                                                                             |                                                                        |         |
| (2) $k = \frac{k_1}{1 + k_2}$ with $k_1 = 1.92 \times 10^{-10} \times e^{-5730/T}$ ; $k_2 = 1.60 \times 10^6 \times e^{-7310/T}$                                                                                                                                                                                                              |                                                                                                             |                                                                        |         |
| (3) $k = \frac{k_1}{1 + k_2}$ with $k_1 = 3.43 \times 10^{-27} \times e^{-5140/T}$ ; $k_2 = 2.86 \times 10^{-11} \times e^{-3560/T}$                                                                                                                                                                                                          |                                                                                                             |                                                                        |         |

**Table S3 Implemented phase transfers in the CAPRAM-DM1.0red**

② reactions that run in the cloud mode ‘sub#1’, ③ reactions that run in the aerosol mode ‘sub#2’

| Species                                                                      | K <sub>H</sub> (298 K) <sup>(a)</sup> | -ΔH/R <sup>(b)</sup> | α     | D <sub>g</sub> (298 K) <sup>(c)</sup> | Comment |
|------------------------------------------------------------------------------|---------------------------------------|----------------------|-------|---------------------------------------|---------|
| D33③ DMS                                                                     | 0.56                                  | 4480                 | 0.001 | 1.08·10 <sup>-5</sup>                 |         |
| D34③ DMSO                                                                    | 1.00·10 <sup>7</sup>                  | 2580                 | 0.1   | 1.01·10 <sup>-5</sup>                 |         |
| D35② DMSO <sub>2</sub>                                                       | 1.00·10 <sup>7</sup>                  | 5390                 | 0.1   | 9.55·10 <sup>-6</sup>                 |         |
| D36② MSIA                                                                    | 1.00·10 <sup>8</sup>                  | 1760                 | 0.1   | 1.11·10 <sup>-5</sup>                 |         |
| D37② MSA                                                                     | 5.09·10 <sup>13</sup>                 | 1760                 | 0.1   | 1.04·10 <sup>-5</sup>                 |         |
| (a) in M atm <sup>-1</sup> ; (b) in K; (c) in m <sup>2</sup> s <sup>-1</sup> |                                       |                      |       |                                       |         |

**Table S4** Implemented aqueous-phase reactions in the CAPRAM-DM1.0red

② reactions that run in the cloud mode 'sub#1', ③ reactions that run in the aerosol mode 'sub#2'

| Nr.  | Reaction                                                                                                                                                                   | Rate constant <sup>(a)</sup>            | Comment |
|------|----------------------------------------------------------------------------------------------------------------------------------------------------------------------------|-----------------------------------------|---------|
| D38  | $\text{DMS} + \text{O}_3 \rightarrow \text{DMSO} + \text{O}_2$                                                                                                             | $k = 8.61 \cdot 10^{+08} \exp(-2600/T)$ |         |
| D39  | $\text{DMSO} + \text{OH} \rightarrow \text{MSIA} + \text{CH}_3$                                                                                                            | $k = 6.65 \cdot 10^{+09} \exp(-1270/T)$ |         |
| D40③ | $\text{DMSO} + \text{SO}_4^- \rightarrow \text{MSIA} + \text{CH}_3 + \text{H}^+ + \text{SO}_4^{2-}$                                                                        | $k = 2.97 \cdot 10^{+09} \exp(-1440/T)$ |         |
| D41③ | $\text{DMSO} + \text{Cl}_2^- \rightarrow \text{MSIA} + \text{HCl} + \text{CH}_3 + \text{Cl}^- - \text{H}_2\text{O}$                                                        | $k = 1.60 \cdot 10^{+07}$               |         |
| D42② | $\text{MSIA} + \text{O}_3 \rightarrow \text{MSA} + \text{O}_2$                                                                                                             | $k = 3.50 \cdot 10^{+07}$               |         |
| D43  | $\text{MSI}^- + \text{OH} \rightarrow \text{CH}_3 + 0.135 \text{SO}_2 + 0.765 \text{MS}^- + 0.765 \text{SO}_3 - 0.765 \text{MSI}^- + 0.9 \text{OH}^- + 0.1 \text{HSO}_3^-$ | $k = 1.20 \cdot 10^{+10}$               |         |
| D44③ | $\text{MSI}^- + \text{Cl}_2^- \rightarrow \text{CH}_3 + 0.15 \text{SO}_2 + 0.85 \text{MS}^- + 0.85 \text{SO}_3 - 0.85 \text{MSI}^- + 2 \text{Cl}^-$                        | $k = 8.00 \cdot 10^{+08}$               |         |
| D45② | $\text{MSI}^- + \text{O}_3 \rightarrow \text{CH}_3\text{SO}_3^- + \text{O}_2$                                                                                              | $k = 2.00 \cdot 10^{+06}$               |         |
| D46  | $\text{MS}^- + \text{OH} \rightarrow \text{HCHO} + \text{SO}_3^- + \text{H}_2\text{O} - 0.5 \text{O}_2$                                                                    | $k = 1.29 \cdot 10^{+07} \exp(-2630/T)$ |         |
| D47② | $\text{MS}^- + \text{Cl}_2^- \rightarrow \text{CH}_3 + \text{SO}_3 + 2 \text{Cl}^-$                                                                                        | $k = 3.89 \cdot 10^{+03}$               |         |

(a)  $k^{2\text{nd}}$  in  $\text{l}^3 \text{mol}^{-1} \text{s}^{-1}$

**Table S5** Implemented aqueous-phase equilibria in the CAPRAM-DM1.0red

| Equilibrium                                                     | $K^{(a)}$            | $k_{f, 298}^{(b)}$   | $E_A/R^{(c)}$ | $k_{b, 298}^{(b)}$   | $E_A/R^{(c)}$ | Comment |
|-----------------------------------------------------------------|----------------------|----------------------|---------------|----------------------|---------------|---------|
| D48② $\text{MSIA} \rightleftharpoons \text{MSI}^- + \text{H}^+$ | $5.0 \cdot 10^{-03}$ | $2.50 \cdot 10^{08}$ |               | $5.00 \cdot 10^{10}$ |               |         |
| D49② $\text{MSA} \rightleftharpoons \text{MS}^- + \text{H}^+$   | 73                   | $3.65 \cdot 10^{12}$ |               | $5.00 \cdot 10^{10}$ |               |         |

(a) in  $\text{M}^{m-n}$ , n order of reaction of forward reaction, m order of reaction of backward reaction; (b)  $k_{298}^{2\text{nd}}$  in  $\text{l}^1 \text{mol}^{-1} \text{s}^{-1}$ ,  $k_{298}^{1\text{st}}$  in  $\text{s}^{-1}$ ; (c) in K

**Table S6**      **Implemented gas-phase reactions in the CAPRAM-HM3.0red**

| Nr. | Reaction                                                                                                                                          | Rate constant <sup>(a)</sup>                     | Comment |
|-----|---------------------------------------------------------------------------------------------------------------------------------------------------|--------------------------------------------------|---------|
| H1  | Cl + O <sub>3</sub> → ClO                                                                                                                         | $k = 2.80 \cdot 10^{-11} \exp(-250/T)$           |         |
| H2  | ClO + HO <sub>2</sub> → HOCl                                                                                                                      | $k = 2.20 \cdot 10^{-12} \exp(340/T)$            |         |
| H3  | HCl + OH → Cl                                                                                                                                     | $k = 1.70 \cdot 10^{-12} \exp(-230/T)$           |         |
| H4  | ClO + NO → Cl + NO <sub>2</sub>                                                                                                                   | $k = 6.20 \cdot 10^{-12} \exp(295/T)$            |         |
| H5  | Cl + NO <sub>2</sub> → ClNO <sub>2</sub>                                                                                                          | TROE                                             |         |
| H6  | ClO + NO <sub>2</sub> → ClNO <sub>3</sub>                                                                                                         | TROE                                             |         |
| H7  | ClNO <sub>3</sub> → ClO + NO <sub>2</sub>                                                                                                         | $k = [M] \cdot 2.75 \cdot 10^{-6} \exp(11438/T)$ |         |
| H8  | Cl + CH <sub>4</sub> → CH <sub>3</sub> O <sub>2</sub> + HCl                                                                                       | $k = 6.60 \cdot 10^{-12} \exp(-1240/T)$          |         |
| H9  | Cl + C <sub>2</sub> H <sub>6</sub> → C <sub>2</sub> H <sub>5</sub> O <sub>2</sub> + HCl                                                           | $k = 8.30 \cdot 10^{-11} \exp(-100/T)$           |         |
| H10 | Cl + C <sub>3</sub> H <sub>8</sub> → C <sub>3</sub> H <sub>7</sub> O <sub>2</sub> + HCl                                                           | $k = 1.40 \cdot 10^{-10}$                        |         |
| H11 | Cl + BIGALKANE → ALKO <sub>2</sub> + HCl                                                                                                          | $k = 1.21 \cdot 10^{-10} \exp(55/T)$             |         |
| H12 | Cl + CH <sub>3</sub> OH → HCHO + HO <sub>2</sub> + HCl                                                                                            | $k = 7.10 \cdot 10^{-11} \exp(-75/T)$            |         |
| H13 | Cl + C <sub>2</sub> H <sub>5</sub> OH → 0.92 CH <sub>3</sub> CHO + 0.92 HO <sub>2</sub> + 0.08 EO <sub>2</sub> + HCl                              | $k = 6.05 \cdot 10^{-11} \exp(155/T)$            |         |
| H14 | Cl + ALKOH → 1.25 MEK + HO <sub>2</sub> + HCl                                                                                                     | $k = 2.70 \cdot 10^{-11} \exp(525/T)$            |         |
| H15 | Cl + CH <sub>3</sub> OOH → HCl + 0.6 CH <sub>3</sub> O <sub>2</sub> + 0.4 HCHO + 0.4 OH                                                           | $k = 5.90 \cdot 10^{-11}$                        |         |
| H16 | Cl + C <sub>2</sub> H <sub>5</sub> OOH → HCl + CH <sub>3</sub> CHO + OH                                                                           | $k = 1.07 \cdot 10^{-10}$                        |         |
| H17 | ClO + CH <sub>3</sub> O <sub>2</sub> → Cl + O <sub>2</sub> + HCHO + HO <sub>2</sub>                                                               | $k = 1.80 \cdot 10^{-11} \exp(-600/T)$           |         |
| H18 | Cl + HCHO → HCl + CO + HO <sub>2</sub>                                                                                                            | $k = 8.10 \cdot 10^{-11} \exp(-34/T)$            |         |
| H19 | Cl + CH <sub>3</sub> CHO → HCl + CH <sub>3</sub> CO <sub>3</sub>                                                                                  | $k = 8.00 \cdot 10^{-11}$                        |         |
| H20 | Cl + C <sub>2</sub> H <sub>5</sub> CHO → HCl + 1.5 CH <sub>3</sub> CO <sub>3</sub>                                                                | $k = 1.30 \cdot 10^{-10}$                        |         |
| H21 | Cl + HYAC → HCl + MGLY + HO <sub>2</sub>                                                                                                          | $k = 5.70 \cdot 10^{-11}$                        |         |
| H22 | Cl + CH <sub>3</sub> COCHO → HCl + CH <sub>3</sub> CO <sub>3</sub> + CO                                                                           | $k = 4.80 \cdot 10^{-11}$                        |         |
| H23 | Cl + GLYOXAL → HCl + 2.0 CO + HO <sub>2</sub>                                                                                                     | $k = 3.80 \cdot 10^{-11}$                        |         |
| H24 | Cl + MEK → HCl + MEKO <sub>2</sub>                                                                                                                | $k = 3.05 \cdot 10^{-11} \exp(80/T)$             |         |
| H25 | Cl + MACR → 0.2 MACRO <sub>2</sub> + 0.8 CC(O[O])(CCl)C=O + 0.2 HCl                                                                               | $k = 2.55 \cdot 10^{-10}$                        |         |
| H26 | CC(O[O])(CCl)C=O + HO <sub>2</sub> → CH <sub>3</sub> COCH <sub>2</sub> Cl + CO + HO <sub>2</sub> + OH                                             | $k = 1.00 \cdot 10^{-11}$                        |         |
| H27 | CC(O[O])(CCl)C=O + NO → CH <sub>3</sub> COCH <sub>2</sub> Cl + CO + HO <sub>2</sub> + NO <sub>2</sub>                                             | $k = 1.17 \cdot 10^{-11}$                        |         |
| H28 | CC(O[O])(CCl)C=O + CH <sub>3</sub> O <sub>2</sub> → CH <sub>3</sub> COCH <sub>2</sub> Cl + CO + HO <sub>2</sub> + HCHO                            | $k = 1.00 \cdot 10^{-12}$                        |         |
| H29 | CC(O[O])(CCl)C=O + CH <sub>3</sub> CO <sub>3</sub> → CH <sub>3</sub> COCH <sub>2</sub> Cl + CO + HO <sub>2</sub> + CH <sub>3</sub> O <sub>2</sub> | $k = 1.00 \cdot 10^{-11}$                        |         |



| Nr. | Reaction                                                                                                                                                                                              | Rate constant <sup>(a)</sup>                   | Comment |
|-----|-------------------------------------------------------------------------------------------------------------------------------------------------------------------------------------------------------|------------------------------------------------|---------|
| H30 | $\text{OH} + \text{CC}(\text{OO})(\text{CCl})\text{C}=\text{O} \rightarrow \text{CH}_3\text{COCH}_2\text{Cl} + \text{CO} + \text{OH}$                                                                 | $k = 3.77 \cdot 10^{-11}$                      |         |
| H31 | $\text{Cl} + \text{MVK} \rightarrow \text{CC}(=\text{O})\text{C}(\text{O}[\text{O}])\text{CCl}$                                                                                                       | $k = 2.10 \cdot 10^{-10}$                      |         |
| H32 | $\text{CC}(=\text{O})\text{C}(\text{O}[\text{O}])\text{CCl} + \text{HO}_2 \rightarrow \text{CC}(=\text{O})\text{C}(\text{OO})\text{CCl}$                                                              | $k = 1.82 \cdot 10^{-13} \exp(1300/\text{T})$  |         |
| H33 | $\text{CC}(=\text{O})\text{C}(\text{O}[\text{O}])\text{CCl} + \text{NO} \rightarrow \text{ClCH}_2\text{CHO} + \text{NO}_2 + \text{CH}_3\text{CO}_3$                                                   | $k = 2.70 \cdot 10^{-12} \exp(360/\text{T})$   |         |
| H34 | $\text{CC}(=\text{O})\text{C}(\text{O}[\text{O}])\text{CCl} + \text{NO}_3 \rightarrow \text{ClCH}_2\text{CHO} + \text{NO}_2 + \text{CH}_3\text{CO}_3$                                                 | $k = 2.30 \cdot 10^{-12}$                      |         |
| H35 | $\text{CC}(=\text{O})\text{C}(\text{O}[\text{O}])\text{CCl} + \text{CH}_3\text{O}_2 \rightarrow \text{ClCH}_2\text{CHO} + \text{CH}_3\text{CO}_3 + \text{HCHO}$                                       | $k = 1.00 \cdot 10^{-12}$                      |         |
| H36 | $\text{CC}(=\text{O})\text{C}(\text{O}[\text{O}])\text{CCl} + \text{CH}_3\text{CO}_3 \rightarrow \text{ClCH}_2\text{CHO} + \text{CH}_3\text{CO}_3 + \text{CH}_3\text{O}_2$                            | $k = 1.00 \cdot 10^{-11}$                      |         |
| H37 | $\text{OH} + \text{CC}(=\text{O})\text{C}(\text{OO})\text{CCl} \rightarrow \text{ClCH}_2\text{CHO} + \text{CH}_3\text{CO}_3 + \text{OH}$                                                              | $k = 3.95 \cdot 10^{-11}$                      |         |
| H38 | $\text{Cl} + \text{BIGALD1} \rightarrow \text{MALO2} + \text{HO}_2 + \text{HCl}$                                                                                                                      | $k = 1.35 \cdot 10^{-10}$                      |         |
| H39 | $\text{Cl} + \text{TOL} \rightarrow \text{HCl} + \text{TOLO2}$                                                                                                                                        | $k = 6.20 \cdot 10^{-11}$                      |         |
| H40 | $\text{Cl} + \text{XYL} \rightarrow \text{HCl} + \text{XYLNO2}$                                                                                                                                       | $k = 1.40 \cdot 10^{-10}$                      |         |
| H41 | $\text{Cl} + \text{BZALD} \rightarrow \text{HCl} + \text{ACBZO2}$                                                                                                                                     | $k = 1.00 \cdot 10^{-10}$                      |         |
| H42 | $\text{Cl} + \text{GLYALD} \rightarrow \text{HCl} + \text{HOCH}_2\text{CO}_3$                                                                                                                         | $k = 7.00 \cdot 10^{-11}$                      |         |
| H43 | $\text{Cl} + \text{CH}_3\text{COCH}_3 \rightarrow \text{HCl} + \text{CH}_3\text{COCH}_2\text{O}_2$                                                                                                    | $k = 3.20 \cdot 10^{-11} \exp(-815/\text{T})$  |         |
| H44 | $\text{Cl} + \text{C}_2\text{H}_2 \rightarrow 0.26 \text{ClCHO} + 0.21 \text{Cl} + 0.53 \text{HCl} + 0.21 \text{GLYOXAL} + 1.32 \text{CO} + 0.79 \text{HO}_2$                                         | TROE                                           |         |
| H45 | $\text{Cl} + \text{C}_2\text{H}_4 \rightarrow \text{ClCH}_2\text{CH}_2\text{O}_2$                                                                                                                     | TROE                                           |         |
| H46 | $\text{ClCH}_2\text{CH}_2\text{O}_2 + \text{HO}_2 \rightarrow \text{ClCH}_2\text{CH}_2\text{OOH}$                                                                                                     | $k = 3.30 \cdot 10^{-13} \exp(820/\text{T})$   |         |
| H47 | $\text{ClCH}_2\text{CH}_2\text{O}_2 + \text{NO} \rightarrow \text{ClCH}_2\text{CHO} + \text{HO}_2 + \text{NO}_2$                                                                                      | $k = 3.24 \cdot 10^{-12} \exp(360/\text{T})$   |         |
| H48 | $\text{ClCH}_2\text{CH}_2\text{O}_2 + \text{NO}_3 \rightarrow \text{ClCH}_2\text{CHO} + \text{HO}_2 + \text{NO}_2$                                                                                    | $k = 2.30 \cdot 10^{-12}$                      |         |
| H49 | $\text{ClCH}_2\text{CH}_2\text{O}_2 + \text{CH}_3\text{O}_2 \rightarrow \text{ClCH}_2\text{CHO} + 0.8 \text{HCHO} + 0.2 \text{CH}_3\text{OH} + 1.4 \text{HO}_2$                                       | $k = 2.00 \cdot 10^{-12}$                      | HM2     |
| H50 | $\text{ClCH}_2\text{CHO} + \text{NO}_3 \rightarrow \text{ClCH}_2\text{CO}_3 + \text{HNO}_3$                                                                                                           | $k = 1.40 \cdot 10^{-12} \exp(-1860/\text{T})$ |         |
| H51 | $\text{ClCH}_2\text{CHO} + \text{OH} \rightarrow \text{ClCH}_2\text{CO}_3 + \text{H}_2\text{O}$                                                                                                       | $k = 2.09 \cdot 10^{-11}$                      |         |
| H52 | $\text{ClCH}_2\text{CO}_3 + \text{HO}_2 \rightarrow 0.44 \text{ClCH}_2\text{O}_2 + 0.44 \text{OH} + 0.15 \text{ClCH}_2\text{COOH} + 0.15 \text{O}_3 + 0.41 \text{ClCH}_2\text{C}(\text{O})\text{OOH}$ | $k = 5.20 \cdot 10^{-13} \exp(980/\text{T})$   |         |
| H53 | $\text{ClCH}_2\text{CO}_3 + \text{NO} \rightarrow \text{ClCH}_2\text{O}_2 + \text{NO}_2$                                                                                                              | $k = 7.50 \cdot 10^{-12} \exp(290/\text{T})$   |         |
| H54 | $\text{ClCH}_2\text{CO}_3 + \text{NO}_2 \rightarrow \text{ClPAN}$                                                                                                                                     | TROE                                           |         |
| H55 | $\text{ClCH}_2\text{CO}_3 + \text{NO}_3 \rightarrow \text{ClCH}_2\text{O}_2 + \text{NO}_2$                                                                                                            | $k = 4.00 \cdot 10^{-12}$                      |         |
| H56 | $\text{ClCH}_2\text{CO}_3 + \text{CH}_3\text{O}_2 \rightarrow 0.7 \text{ClCH}_2\text{O}_2 + 0.3 \text{ClCH}_2\text{COOH} + 0.7 \text{HO}_2 + \text{HCHO}$                                             | $k = 1.00 \cdot 10^{-11}$                      |         |
| H57 | $\text{ClCH}_2\text{COOH} + \text{OH} \rightarrow \text{ClCH}_2\text{O}_2$                                                                                                                            | $k = 1.90 \cdot 10^{-12} \exp(190/\text{T})$   |         |
| H58 | $\text{ClCH}_2\text{C}(\text{O})\text{OOH} + \text{OH} \rightarrow \text{ClCH}_2\text{O}_2$                                                                                                           | $k = 4.29 \cdot 10^{-12}$                      |         |

| Nr. | Reaction                                                                                                                                                                                                                                                                                       | Rate constant <sup>(a)</sup>            | Comment |
|-----|------------------------------------------------------------------------------------------------------------------------------------------------------------------------------------------------------------------------------------------------------------------------------------------------|-----------------------------------------|---------|
| H59 | $\text{CIPAN} + \text{OH} \rightarrow \text{ClCHO} + \text{CO} + \text{NO}_2$                                                                                                                                                                                                                  | $k = 6.26 \cdot 10^{-13}$               |         |
| H60 | $\text{CIPAN} \rightarrow \text{ClCH}_2\text{CO}_3 + \text{NO}_2$                                                                                                                                                                                                                              | TROE                                    |         |
| H61 | $\text{ClCH}_2\text{O}_2 + \text{HO}_2 \rightarrow 0.3 \text{ClCH}_2\text{OOH} + 0.7 \text{ClCHO}$                                                                                                                                                                                             | $k = 3.20 \cdot 10^{-13} \exp(820/T)$   |         |
| H62 | $\text{ClCH}_2\text{O}_2 + \text{NO} \rightarrow \text{ClCHO} + \text{HO}_2 + \text{NO}_2$                                                                                                                                                                                                     | $k = 4.05 \cdot 10^{-12} \exp(360/T)$   |         |
| H63 | $\text{ClCH}_2\text{O}_2 + \text{NO}_3 \rightarrow \text{ClCHO} + \text{HO}_2 + \text{NO}_2$                                                                                                                                                                                                   | $k = 2.30 \cdot 10^{-12}$               |         |
| H64 | $\text{ClCH}_2\text{O}_2 + \text{CH}_3\text{O}_2 \rightarrow 1.4 \text{HO}_2 + \text{ClCHO} + 0.8 \text{HCHO} + 0.2 \text{CH}_3\text{OH}$                                                                                                                                                      | $k = 2.50 \cdot 10^{-12}$               | HM2     |
| H65 | $\text{Cl} + \text{C}_3\text{H}_6 \rightarrow 0.4 \text{CH}_3\text{CH}(\text{O}_2)\text{CH}_2\text{Cl} + 0.5 \text{CH}_3\text{CH}(\text{Cl})\text{CH}_2\text{O}_2 + 0.1 \text{HYAC}$                                                                                                           | $k = 1.43 \cdot 10^{-14} \exp(2886/T)$  |         |
| H66 | $\text{CH}_3\text{CH}(\text{O}_2)\text{CH}_2\text{Cl} + \text{NO} \rightarrow \text{CH}_3\text{COCH}_2\text{Cl} + \text{HO}_2 + \text{NO}_2$                                                                                                                                                   | $k = 2.70 \cdot 10^{-12} \exp(360/T)$   |         |
| H67 | $\text{CH}_3\text{CH}(\text{Cl})\text{CH}_2\text{O}_2 + \text{NO} \rightarrow \text{CH}_3\text{CH}(\text{Cl})\text{CHO} + \text{NO}_2 + \text{HO}_2$                                                                                                                                           | $k = 2.70 \cdot 10^{-12} \exp(360/T)$   |         |
| H68 | $\text{CH}_3\text{CH}(\text{O}_2)\text{CH}_2\text{Cl} + \text{CH}_3\text{O}_2 \rightarrow \text{CH}_3\text{COCH}_2\text{Cl} + 0.8 \text{HCHO} + 0.2 \text{CH}_3\text{OH} + 1.4 \text{HO}_2$                                                                                                    | $k = 4.00 \cdot 10^{-14}$               | HM2     |
| H69 | $\text{CH}_3\text{CH}(\text{Cl})\text{CH}_2\text{O}_2 + \text{CH}_3\text{O}_2 \rightarrow \text{CH}_3\text{CH}(\text{Cl})\text{CHO} + 0.8 \text{HCHO} + 0.2 \text{CH}_3\text{OH} + 1.4 \text{HO}_2$                                                                                            | $k = 6.48 \cdot 10^{-13}$               | HM2     |
| H70 | $\text{CH}_3\text{COCH}_2\text{Cl} + \text{OH} \rightarrow \text{CH}_3\text{COCHClO}_2$                                                                                                                                                                                                        | $k = 3.68 \cdot 10^{-13}$               |         |
| H71 | $\text{CH}_3\text{COCHClO}_2 + \text{HO}_2 \rightarrow \text{CH}_3\text{COCHClOOH}$                                                                                                                                                                                                            | $k = 3.30 \cdot 10^{-13} \exp(820/T)$   |         |
| H72 | $\text{CH}_3\text{COCHClO}_2 + \text{NO} \rightarrow \text{ClCHO} + \text{CH}_3\text{CO}_3 + \text{NO}_2$                                                                                                                                                                                      | $k = 2.70 \cdot 10^{-12} \exp(360/T)$   |         |
| H73 | $\text{CH}_3\text{COCHClO}_2 + \text{NO}_3 \rightarrow \text{ClCHO} + \text{CH}_3\text{CO}_3 + \text{NO}_2$                                                                                                                                                                                    | $k = 2.30 \cdot 10^{-12}$               |         |
| H74 | $\text{CH}_3\text{COCHClO}_2 + \text{CH}_3\text{O}_2 \rightarrow \text{ClCHO} + \text{CH}_3\text{CO}_3 + 0.8 \text{HCHO} + 0.2 \text{CH}_3\text{OH} + \text{HO}_2$                                                                                                                             | $k = 2.00 \cdot 10^{-12}$               | HM2     |
| H75 | $\text{CH}_3\text{COCHClOOH} + \text{OH} \rightarrow \text{CH}_3\text{COCHClO}_2$                                                                                                                                                                                                              | $k = 8.34 \cdot 10^{-12}$               |         |
| H76 | $\text{ClCHO} + \text{NO}_3 \rightarrow \text{CO} + \text{Cl} + \text{HNO}_3$                                                                                                                                                                                                                  | $k = 1.40 \cdot 10^{-12} \exp(-1860/T)$ |         |
| H77 | $\text{ClCHO} + \text{OH} \rightarrow \text{CO} + \text{Cl} + \text{H}_2\text{O}$                                                                                                                                                                                                              | $k = 6.12 \cdot 10^{-12}$               |         |
| H78 | $\text{CH}_3\text{CH}(\text{Cl})\text{CHO} + \text{OH} \rightarrow \text{CH}_3\text{CH}(\text{Cl})\text{C}(\text{O})\text{O}_2$                                                                                                                                                                | $k = 4.90 \cdot 10^{-12} \exp(405/T)$   |         |
| H79 | $\text{CH}_3\text{CH}(\text{Cl})\text{CHO} + \text{NO}_3 \rightarrow \text{CH}_3\text{CH}(\text{Cl})\text{C}(\text{O})\text{O}_2 + \text{HNO}_3$                                                                                                                                               | $k = 3.24 \cdot 10^{-12} \exp(-1860/T)$ |         |
| H80 | $\text{CH}_3\text{CH}(\text{Cl})\text{C}(\text{O})\text{O}_2 + \text{HO}_2 \rightarrow 0.15 \text{CH}_3\text{CH}(\text{Cl})\text{COOH} + 0.15 \text{O}_3 + 0.41 \text{CH}_3\text{CH}(\text{Cl})\text{C}(\text{O})\text{OOH} + 0.44 \text{CH}_3\text{CH}(\text{Cl})\text{O}_2 + 0.44 \text{OH}$ | $k = 5.20 \cdot 10^{-13} \exp(980/T)$   |         |
| H81 | $\text{CH}_3\text{CH}(\text{Cl})\text{C}(\text{O})\text{O}_2 + \text{NO} \rightarrow \text{CH}_3\text{CH}(\text{Cl})\text{O}_2 + \text{NO}_2$                                                                                                                                                  | $k = 7.50 \cdot 10^{-12} \exp(290/T)$   |         |
| H82 | $\text{CH}_3\text{CH}(\text{Cl})\text{CO}_3 + \text{NO}_2 \rightarrow \text{CH}_3\text{CIPAN}$                                                                                                                                                                                                 | TROE                                    |         |
| H83 | $\text{CH}_3\text{CIPAN} \rightarrow \text{CH}_3\text{CH}(\text{Cl})\text{CO}_3 + \text{NO}_2$                                                                                                                                                                                                 | TROE                                    |         |
| H84 | $\text{CH}_3\text{CH}(\text{Cl})\text{C}(\text{O})\text{O}_2 + \text{NO}_3 \rightarrow \text{CH}_3\text{CH}(\text{Cl})\text{O}_2 + \text{NO}_2$                                                                                                                                                | $k = 4.00 \cdot 10^{-12}$               |         |

| Nr.  | Reaction                                                                                                                                                                                                                              | Rate constant <sup>(a)</sup>                   | Comment                                     |
|------|---------------------------------------------------------------------------------------------------------------------------------------------------------------------------------------------------------------------------------------|------------------------------------------------|---------------------------------------------|
| H85  | $\text{CH}_3\text{CH}(\text{Cl})\text{C}(\text{O})\text{O}_2 + \text{CH}_3\text{O}_2 \rightarrow 0.3 \text{CH}_3\text{CH}(\text{Cl})\text{COOH} + 0.7 \text{CH}_3\text{CH}(\text{Cl})\text{O}_2 + \text{HCHO} + \text{HO}_2$          | $k = 1.00 \cdot 10^{-11}$                      | Estimated like $\text{ClCH}_2\text{CO}_3$   |
| H86  | $\text{CC}(\text{Cl})\text{C}(\text{=O})\text{OO} + \text{OH} \rightarrow \text{CC}(\text{Cl})\text{C}(\text{=O})\text{O}[\text{O}]$                                                                                                  | $k = 4.42 \cdot 10^{-12}$                      |                                             |
| H87  | $\text{CH}_3\text{CH}(\text{Cl})\text{COOH} + \text{OH} \rightarrow \text{CH}_3\text{CH}(\text{Cl})\text{O}_2$                                                                                                                        | $k = 1.20 \cdot 10^{-12}$                      |                                             |
| H88  | $\text{CH}_3\text{CH}(\text{Cl})\text{O}_2 + \text{HO}_2 \rightarrow \text{CH}_3\text{CH}(\text{Cl})\text{OOH}$                                                                                                                       | $k = 3.30 \cdot 10^{-13} \exp(820/\text{T})$   |                                             |
| H89  | $\text{CH}_3\text{CH}(\text{Cl})\text{O}_2 + \text{NO} \rightarrow \text{CH}_3\text{CHO} + \text{Cl} + \text{NO}_2$                                                                                                                   | $k = 4.05 \cdot 10^{-12} \exp(360/\text{T})$   |                                             |
| H90  | $\text{CH}_3\text{CH}(\text{Cl})\text{O}_2 + \text{NO}_3 \rightarrow \text{CH}_3\text{CHO} + \text{Cl} + \text{NO}_2$                                                                                                                 | $k = 2.30 \cdot 10^{-12}$                      |                                             |
| H91  | $\text{CH}_3\text{CH}(\text{Cl})\text{O}_2 + \text{CH}_3\text{O}_2 \rightarrow 0.6 \text{CH}_3\text{CHO} + 0.6 \text{Cl} + 0.4 \text{CH}_3\text{C}(\text{O})\text{Cl} + 0.8 \text{HCHO} + 0.2 \text{CH}_3\text{OH} + 0.8 \text{HO}_2$ | $k = 2.65 \cdot 10^{-12}$                      | HM2                                         |
| H92  | $\text{CH}_3\text{CH}(\text{Cl})\text{OOH} + \text{OH} \rightarrow \text{CH}_3\text{CH}(\text{Cl})\text{O}_2 + \text{H}_2\text{O}$                                                                                                    | $k = 1.90 \cdot 10^{-12} \exp(190/\text{T})$   |                                             |
| H93  | $\text{CH}_3\text{CH}(\text{Cl})\text{OOH} + \text{OH} \rightarrow \text{CH}_3\text{C}(\text{O})\text{Cl} + \text{OH} + \text{H}_2\text{O}$                                                                                           | $k = 9.95 \cdot 10^{-12}$                      |                                             |
| H94  | $\text{CH}_3\text{C}(\text{O})\text{Cl} + \text{OH} \rightarrow \text{ClCOCH}_2\text{O}_2 + \text{H}_2\text{O}$                                                                                                                       | $k = 3.88 \cdot 10^{-14}$                      |                                             |
| H95  | $\text{ClCOCH}_2\text{O}_2 + \text{HO}_2 \rightarrow \text{ClCOCH}_2\text{OOH}$                                                                                                                                                       | $k = 3.30 \cdot 10^{-13} \exp(820/\text{T})$   |                                             |
| H96  | $\text{ClCOCH}_2\text{O}_2 + \text{NO} \rightarrow \text{HCHO} + \text{Cl} + \text{CO} + \text{NO}_2$                                                                                                                                 | $k = 3.24 \cdot 10^{-12} \exp(360/\text{T})$   |                                             |
| H97  | $\text{ClCOCH}_2\text{O}_2 + \text{NO}_3 \rightarrow \text{HCHO} + \text{Cl} + \text{CO} + \text{NO}_2$                                                                                                                               | $k = 2.30 \cdot 10^{-12}$                      |                                             |
| H98  | $\text{ClCOCH}_2\text{O}_2 + \text{CH}_3\text{O}_2 \rightarrow 2 \text{HCHO} + \text{Cl} + \text{CO} + \text{HO}_2$                                                                                                                   | $k = 2.00 \cdot 10^{-12}$                      | HM2                                         |
| H99  | $\text{Br} + \text{O}_3 \rightarrow \text{BrO}$                                                                                                                                                                                       | $k = 1.70 \cdot 10^{-11} \exp(-800/\text{T})$  |                                             |
| H100 | $\text{BrO} + \text{HO}_2 \rightarrow \text{HOBr}$                                                                                                                                                                                    | $k = 4.50 \cdot 10^{-12} \exp(-500/\text{T})$  |                                             |
| H101 | $\text{BrO} + \text{BrO} \rightarrow 1.7 \text{Br} + 0.15 \text{Br}_2$                                                                                                                                                                | $k = 1.60 \cdot 10^{-12} \exp(-210/\text{T})$  |                                             |
| H102 | $\text{Br} + \text{NO}_2 \rightarrow \text{BrNO}_2$                                                                                                                                                                                   | TROE                                           |                                             |
| H103 | $\text{BrO} + \text{NO} \rightarrow \text{Br} + \text{NO}_2$                                                                                                                                                                          | $k = 8.70 \cdot 10^{-12} \exp(-260/\text{T})$  |                                             |
| H104 | $\text{BrO} + \text{NO}_2 \rightarrow \text{BrNO}_3$                                                                                                                                                                                  | TROE                                           |                                             |
| H105 | $\text{BrNO}_3 \rightarrow \text{BrO} + \text{NO}_2$                                                                                                                                                                                  | $k = 2.79 \cdot 10^{13} \exp(-12360/\text{T})$ |                                             |
| H106 | $\text{Br} + \text{BrNO}_3 \rightarrow \text{Br}_2 + \text{NO}_3$                                                                                                                                                                     | $k = 4.90 \cdot 10^{-11}$                      |                                             |
| H107 | $\text{BrO} + \text{ClO} \rightarrow 0.95 \text{Br} + 0.5 \text{OClO} + 0.45 \text{Cl} + 0.05 \text{BrCl}$                                                                                                                            | $k = 7.32 \cdot 10^{-12} \exp(-200/\text{T})$  | Summation A-Factor Burkholder et al. (2015) |
| H108 | $\text{BrO} + \text{CH}_3\text{O}_2 \rightarrow 0.25 \text{Br} + 0.25 \text{HCHO} + 0.25 \text{HO}_2 + 0.75 \text{HOBr} + 0.75 \text{HCOOH}$                                                                                          | $k = 4.10 \cdot 10^{-13} \exp(-800/\text{T})$  |                                             |
| H109 | $\text{Br} + \text{C}_2\text{H}_2 \rightarrow 0.17 \text{BrCHO} + 0.09 \text{Br} + 0.74 \text{HBr} + 0.09 \text{GLYOXAL} + 1.65 \text{CO} + 0.91 \text{HO}_2$                                                                         | $k = 6.35 \cdot 10^{-15} \exp(-440/\text{T})$  |                                             |
| H110 | $\text{Br} + \text{HCHO} \rightarrow \text{HBr} + \text{CO} + \text{HO}_2$                                                                                                                                                            | $k = 1.70 \cdot 10^{-11} \exp(-800/\text{T})$  |                                             |
| H111 | $\text{BrO} + \text{HCHO} \rightarrow \text{HOBr} + \text{CO} + \text{HO}_2$                                                                                                                                                          | $k = 1.50 \cdot 10^{-14}$                      |                                             |

| Nr.  | Reaction                                                                                                                                                                                                             | Rate constant <sup>(a)</sup>            | Comment |
|------|----------------------------------------------------------------------------------------------------------------------------------------------------------------------------------------------------------------------|-----------------------------------------|---------|
| H112 | $\text{Br} + \text{CH}_3\text{CHO} \rightarrow \text{HBr} + \text{CH}_3\text{CO}_3$                                                                                                                                  | $k = 1.80 \cdot 10^{-11} \exp(-460/T)$  |         |
| H113 | $\text{Br} + \text{C}_2\text{H}_5\text{CHO} \rightarrow \text{HBr} + 1.5 \text{CH}_3\text{CO}_3$                                                                                                                     | $k = 5.75 \cdot 10^{-11} \exp(-610/T)$  |         |
| H114 | $\text{Br} + \text{C}_2\text{H}_4 \rightarrow \text{BrCH}_2\text{CH}_2\text{O}_2$                                                                                                                                    | $k = 2.25 \cdot 10^{-13} \exp(-277/T)$  |         |
| H115 | $\text{BrCH}_2\text{CH}_2\text{O}_2 + \text{NO} \rightarrow \text{BrCH}_2\text{CHO} + \text{HO}_2 + \text{NO}_2$                                                                                                     | $k = 9.70 \cdot 10^{-12}$               |         |
| H116 | $\text{BrCH}_2\text{CH}_2\text{O}_2 + \text{CH}_3\text{O}_2 \rightarrow \text{BrCH}_2\text{CHO} + 0.8 \text{HCHO} + 0.2 \text{CH}_3\text{OH} + 1.4 \text{HO}_2$                                                      | $k = 2.00 \cdot 10^{-12}$               | HM2     |
| H117 | $\text{BrCH}_2\text{CHO} + \text{OH} \rightarrow \text{BrCH}_2\text{CO}_3 + \text{H}_2\text{O}$                                                                                                                      | $k = 2.05 \cdot 10^{-12}$               |         |
| H118 | $\text{BrCH}_2\text{CO}_3 + \text{HO}_2 \rightarrow$<br>$0.15 \text{BrCH}_2\text{COOH} + 0.15 \text{O}_3 + 0.41 \text{BrCH}_2\text{C(O)OOH} + 0.44 \text{BrCH}_2\text{O}_2 + 0.44$<br>$\text{OH}$                    | $k = 5.20 \cdot 10^{-13} \exp(980/T)$   |         |
| H119 | $\text{BrCH}_2\text{CO}_3 + \text{NO} \rightarrow \text{BrCH}_2\text{O}_2 + \text{NO}_2$                                                                                                                             | $k = 7.50 \cdot 10^{-12} \exp(290/T)$   |         |
| H120 | $\text{BrCH}_2\text{CO}_3 + \text{CH}_3\text{O}_2 \rightarrow 0.7 \text{BrCH}_2\text{O}_2 + 0.3 \text{BrCH}_2\text{COOH} + 0.7 \text{HO}_2 + \text{HCHO}$                                                            | $k = 1.00 \cdot 10^{-11}$               | HM2     |
| H121 | $\text{BrCH}_2\text{COOH} + \text{OH} \rightarrow \text{BrCH}_2\text{O}_2 + \text{H}_2\text{O}$                                                                                                                      | $k = 1.90 \cdot 10^{-12} \exp(190/T)$   |         |
| H122 | $\text{BrCH}_2\text{C(O)OOH} + \text{OH} \rightarrow \text{BrCH}_2\text{CO}_3 + \text{H}_2\text{O}$                                                                                                                  | $k = 3.79 \cdot 10^{-12}$               |         |
| H123 | $\text{BrCH}_2\text{O}_2 + \text{HO}_2 \rightarrow \text{BrCH}_2\text{OOH}$                                                                                                                                          | $k = 4.28 \cdot 10^{-13} \exp(820/T)$   |         |
| H124 | $\text{BrCH}_2\text{O}_2 + \text{NO} \rightarrow \text{BrCHO} + \text{HO}_2 + \text{NO}_2$                                                                                                                           | $k = 4.05 \cdot 10^{-12} \exp(360/T)$   |         |
| H125 | $\text{BrCH}_2\text{O}_2 + \text{NO}_3 \rightarrow \text{BrCHO} + \text{HO}_2 + \text{NO}_2$                                                                                                                         | $k = 2.30 \cdot 10^{-12}$               |         |
| H126 | $\text{BrCH}_2\text{O}_2 + \text{CH}_3\text{O}_2 \rightarrow 1.4 \text{HO}_2 + \text{BrCHO} + 0.8 \text{HCHO} + 0.2 \text{CH}_3\text{OH}$                                                                            | $k = 2.00 \cdot 10^{-12}$               | HM2     |
| H127 | $\text{BrCH}_2\text{OOH} + \text{OH} \rightarrow \text{BrCH}_2\text{O}_2 + \text{H}_2\text{O}$                                                                                                                       | $k = 1.90 \cdot 10^{-12} \exp(190/T)$   |         |
| H128 | $\text{BrCH}_2\text{OOH} + \text{OH} \rightarrow \text{BrCHO} + \text{OH} + \text{H}_2\text{O}$                                                                                                                      | $k = 5.79 \cdot 10^{-12}$               |         |
| H129 | $\text{BrCHO} + \text{NO}_3 \rightarrow \text{CO} + \text{Br} + \text{HNO}_3$                                                                                                                                        | $k = 1.40 \cdot 10^{-12} \exp(-1860/T)$ |         |
| H130 | $\text{BrCHO} + \text{OH} \rightarrow \text{CO} + \text{Br} + \text{H}_2\text{O}$                                                                                                                                    | $k = 1.16 \cdot 10^{-12}$               |         |
| H131 | $\text{Br} + \text{C}_3\text{H}_6 \rightarrow \text{CH}_3\text{CH(O}_2\text{)CH}_2\text{Br}$                                                                                                                         | $k = 3.60 \cdot 10^{-12}$               |         |
| H132 | $\text{CH}_3\text{CH(O}_2\text{)CH}_2\text{Br} + \text{NO} \rightarrow \text{CH}_3\text{COCH}_2\text{Br} + \text{HO}_2 + \text{NO}_2$                                                                                | $k = 2.70 \cdot 10^{-12} \exp(360/T)$   |         |
| H133 | $\text{CH}_3\text{CH(O}_2\text{)CH}_2\text{Br} + \text{CH}_3\text{O}_2 \rightarrow \text{CH}_3\text{COCH}_2\text{Br} + 0.8 \text{HCHO} + 0.2 \text{CH}_3\text{OH} + 1.4$<br>$\text{HO}_2$                            | $k = 4.00 \cdot 10^{-14}$               | HM2     |
| H134 | $\text{CH}_3\text{COCH}_2\text{Br} + \text{OH} \rightarrow \text{CH}_3\text{COCHBrO}_2$                                                                                                                              | $k = 8.80 \cdot 10^{-12} \exp(-1320/T)$ |         |
| H135 | $\text{CH}_3\text{COCHBrO}_2 + \text{NO} \rightarrow \text{CH}_3\text{CO}_3 + \text{BrCHO} + \text{NO}_2$                                                                                                            | $k = 8.00 \cdot 10^{-12}$               |         |
| H136 | $\text{CH}_3\text{COCHBrO}_2 + \text{CH}_3\text{O}_2 \rightarrow 0.4 \text{CH}_3\text{COC(O)Br} + 0.6 \text{CH}_3\text{CO}_3 + 0.6 \text{BrCHO} +$<br>$0.8 \text{HO}_2 + 0.8 \text{HCHO} + 0.2 \text{CH}_3\text{OH}$ | $k = 2.00 \cdot 10^{-12}$               |         |
| H137 | $\text{I} + \text{O}_3 \rightarrow \text{IO}$                                                                                                                                                                        | $k = 2.10 \cdot 10^{-11} \exp(-830/T)$  |         |
| H138 | $\text{I}_2 + \text{OH} \rightarrow \text{I} + \text{HOI}$                                                                                                                                                           | $k = 2.10 \cdot 10^{-10}$               |         |

| Nr.                         | Reaction                                                                                                             | Rate constant <sup>(a)</sup>                                          | Comment |
|-----------------------------|----------------------------------------------------------------------------------------------------------------------|-----------------------------------------------------------------------|---------|
| H139                        | $\text{IO} + \text{HO}_2 \rightarrow \text{HOI}$                                                                     | $k = 1.40 \cdot 10^{-11} \exp(540/T)$                                 |         |
| H140                        | $\text{IO} + \text{IO} \rightarrow 0.38 \text{ OIO} + 0.46 \text{ I}_2\text{O}_2 + 0.6 \text{ I} + 0.05 \text{ I}_2$ | $k = 5.40 \cdot 10^{-11} \exp(180/T)$                                 |         |
| H141                        | $\text{OIO} + \text{OH} \rightarrow \text{HIO}_3$                                                                    | $k = 2.20 \cdot 10^{-10} \exp(243/T)$                                 |         |
| H142                        | $\text{IO} + \text{O}_3 \rightarrow 0.83 \text{ I} + 0.17 \text{ OIO}$                                               | $k = 1.20 \cdot 10^{-15}$                                             |         |
| H143                        | $\text{IO} + \text{OIO} \rightarrow \text{I}_2\text{O}_3$                                                            | $k = 1.00 \cdot 10^{-10}$                                             |         |
| H144                        | $\text{I}_2\text{O}_3 \rightarrow \text{IO} + \text{OIO}$                                                            | $k = 2.78 \cdot 10^{-11}$                                             |         |
| H145                        | $\text{OIO} + \text{OIO} \rightarrow \text{I}_2\text{O}_4$                                                           | $k = 1.00 \cdot 10^{-10}$                                             |         |
| H146                        | $\text{I}_2\text{O}_4 \rightarrow \text{OIO} + \text{OIO}$                                                           | $k = 1.67 \cdot 10^{+00}$                                             |         |
| H147                        | $\text{I}_2 + \text{O}_3 \rightarrow \text{IO} + \text{I}$                                                           | $k = 4.02 \cdot 10^{-15} \exp(-2050/T)$                               |         |
| H148                        | $\text{I}_2\text{O}_2 \rightarrow 0.995 \text{ OIO} + 0.995 \text{ I} + 0.01 \text{ IO}$                             | $k = 1.00 \cdot 10^{+01}$                                             |         |
| H149                        | $\text{I}_2 + \text{NO}_3 \rightarrow \text{I} + \text{INO}_3$                                                       | $k = 1.50 \cdot 10^{-12}$                                             |         |
| H150                        | $\text{IO} + \text{NO} \rightarrow \text{I} + \text{NO}_2$                                                           | $k = 7.15 \cdot 10^{-12} \exp(300/T)$                                 |         |
| H151                        | $\text{IO} + \text{NO}_2 \rightarrow \text{INO}_3$                                                                   | TROE                                                                  |         |
| H152                        | $\text{INO}_3 \rightarrow \text{IO} + \text{NO}_2$                                                                   | $k = [\text{M}] \cdot 4.40 \cdot 10^{-05} \exp(12060/T)$              |         |
| H153                        | $\text{IO} + \text{CH}_3\text{O}_2 \rightarrow \text{I} + \text{HO}_2 + \text{HCHO}$                                 | $k = 2.00 \cdot 10^{-12}$                                             |         |
| H154                        | $\text{IO} + \text{ClO} \rightarrow 0.8 \text{ I} + 0.55 \text{ OClO} + 0.25 \text{ Cl} + 0.2 \text{ ICl}$           | $k = 4.70 \cdot 10^{-12} \exp(280/T)$                                 |         |
| H155                        | $\text{IO} + \text{BrO} \rightarrow 0.8 \text{ OIO} + \text{Br} + 0.2 \text{ I}$                                     | $k = 1.50 \cdot 10^{-11} \exp(510/T)$                                 |         |
| <b>Photolysis reactions</b> |                                                                                                                      |                                                                       |         |
| H156                        | $\text{Cl}_2 \rightarrow \text{Cl} + \text{Cl}$                                                                      | $J = 3.827 \cdot 10^{-03} \cos(\chi)^{0.543} \exp(-0.244/\cos(\chi))$ |         |
| H157                        | $\text{ClO} \rightarrow \text{Cl} + \text{O}({}^3\text{P})$                                                          | $J = 4.755 \cdot 10^{-04} \cos(\chi)^{1.258} \exp(-0.588/\cos(\chi))$ |         |
| H158                        | $\text{OClO} \rightarrow \text{ClO} + \text{O}({}^3\text{P})$                                                        | $J = 1.332 \cdot 10^{-01} \cos(\chi)^{0.416} \exp(-0.244/\cos(\chi))$ |         |
| H159                        | $\text{HOCl} \rightarrow \text{Cl} + \text{OH}$                                                                      | $J = 4.615 \cdot 10^{-04} \cos(\chi)^{0.656} \exp(-0.240/\cos(\chi))$ |         |
| H160                        | $\text{ClNO}_2 \rightarrow \text{Cl} + \text{NO}_2$                                                                  | $J = 6.219 \cdot 10^{-04} \cos(\chi)^{0.774} \exp(-0.255/\cos(\chi))$ |         |
| H161                        | $\text{ClNO}_3 \rightarrow \text{Cl} + \text{NO}_3$                                                                  | $J = 6.420 \cdot 10^{-05} \cos(\chi)^{0.648} \exp(-0.217/\cos(\chi))$ |         |
| H162                        | $\text{ClNO}_3 \rightarrow \text{ClO} + \text{NO}_2$                                                                 | $J = 1.393 \cdot 10^{-05} \cos(\chi)^{1.052} \exp(-0.243/\cos(\chi))$ |         |
| H163                        | $\text{CC(=O)C(OO)CCl} \rightarrow \text{ClCH}_2\text{CHO} + \text{CH}_3\text{CO}_3 + \text{OH}$                     | $J = 7.649 \cdot 10^{-05} \cos(\chi)^{0.682} \exp(-0.279/\cos(\chi))$ |         |
| H164                        | $\text{ClCH}_2\text{CH}_2\text{OOH} \rightarrow \text{ClCH}_2\text{CHO} + \text{HO}_2 + \text{OH}$                   | $J = 7.649 \cdot 10^{-06} \cos(\chi)^{0.682} \exp(-0.279/\cos(\chi))$ |         |
| H165                        | $\text{ClCH}_2\text{CHO} \rightarrow \text{ClCH}_2\text{O}_2 + \text{HO}_2 + \text{CO}$                              | $J = 4.642 \cdot 10^{-05} \cos(\chi)^{0.762} \exp(-0.353/\cos(\chi))$ |         |
| H166                        | $\text{ClCH}_2\text{C(O)OOH} \rightarrow \text{ClCH}_2\text{O}_2 + \text{OH}$                                        | $J = 7.649 \cdot 10^{-06} \cos(\chi)^{0.682} \exp(-0.279/\cos(\chi))$ |         |
| H167                        | $\text{ClCH}_2\text{OOH} \rightarrow \text{ClCHO} + \text{HO}_2 + \text{OH}$                                         | $J = 7.649 \cdot 10^{-06} \cos(\chi)^{0.682} \exp(-0.279/\cos(\chi))$ |         |

| Nr.  | Reaction                                                                                                                                                                  | Rate constant <sup>(a)</sup>                                          | Comment |
|------|---------------------------------------------------------------------------------------------------------------------------------------------------------------------------|-----------------------------------------------------------------------|---------|
| H168 | CH <sub>3</sub> CH(O)CH <sub>2</sub> Cl → CH <sub>3</sub> O <sub>2</sub> + ClCH <sub>2</sub> CO <sub>3</sub>                                                              | $J = 5.804 \cdot 10^{-06} \cos(\chi)^{1.092} \exp(-0.377/\cos(\chi))$ |         |
| H169 | CH <sub>3</sub> CH(O)CHClOOH → ClCHO + CH <sub>3</sub> CO <sub>3</sub> + OH                                                                                               | $J = 7.649 \cdot 10^{-06} \cos(\chi)^{0.682} \exp(-0.279/\cos(\chi))$ |         |
| H170 | ClCHO → HO <sub>2</sub> + CO + Cl                                                                                                                                         | $J = 4.642 \cdot 10^{-05} \cos(\chi)^{0.762} \exp(-0.353/\cos(\chi))$ |         |
| H171 | CH <sub>3</sub> CH(Cl)CHO → CH <sub>3</sub> CH(Cl)O <sub>2</sub> + HO <sub>2</sub> + CO                                                                                   | $J = 2.879 \cdot 10^{-05} \cos(\chi)^{1.067} \exp(-0.358/\cos(\chi))$ |         |
| H172 | CH <sub>3</sub> CH(Cl)OOH → CH <sub>3</sub> CHO + Cl + OH                                                                                                                 | $J = 7.649 \cdot 10^{-06} \cos(\chi)^{0.682} \exp(-0.279/\cos(\chi))$ |         |
| H173 | CH <sub>3</sub> C(O)Cl → CH <sub>3</sub> CO <sub>3</sub> + Cl                                                                                                             | $J = 5.804 \cdot 10^{-06} \cos(\chi)^{1.092} \exp(-0.377/\cos(\chi))$ |         |
| H174 | ClCOCH <sub>2</sub> OOH → ClCOCH <sub>2</sub> O <sub>2</sub> + OH                                                                                                         | $J = 7.649 \cdot 10^{-06} \cos(\chi)^{0.682} \exp(-0.279/\cos(\chi))$ |         |
| H175 | Br <sub>2</sub> → Br + Br                                                                                                                                                 | $J = 4.773 \cdot 10^{-02} \cos(\chi)^{0.193} \exp(-0.213/\cos(\chi))$ |         |
| H176 | BrO → Br + O( <sup>3</sup> P)                                                                                                                                             | $J = 6.368 \cdot 10^{-02} \cos(\chi)^{0.605} \exp(-0.269/\cos(\chi))$ |         |
| H177 | HOBr → Br + OH                                                                                                                                                            | $J = 3.464 \cdot 10^{-03} \cos(\chi)^{0.441} \exp(-0.214/\cos(\chi))$ |         |
| H178 | BrNO <sub>2</sub> → Br + NO <sub>2</sub>                                                                                                                                  | $J = 7.443 \cdot 10^{-03} \cos(\chi)^{0.355} \exp(-0.236/\cos(\chi))$ |         |
| H179 | BrNO <sub>3</sub> → 0.29 Br + 0.29 NO <sub>3</sub> + 0.71 BrO + 0.71 NO <sub>2</sub>                                                                                      | $J = 2.194 \cdot 10^{-04} \cos(\chi)^{0.492} \exp(-0.215/\cos(\chi))$ |         |
| H180 | BrCl → Br + Cl                                                                                                                                                            | $J = 1.650 \cdot 10^{-02} \cos(\chi)^{0.297} \exp(-0.224/\cos(\chi))$ |         |
| H181 | BrCH <sub>2</sub> CHO → BrCH <sub>2</sub> O <sub>2</sub> + HO <sub>2</sub> + CO                                                                                           | $J = 4.642 \cdot 10^{-05} \cos(\chi)^{0.762} \exp(-0.353/\cos(\chi))$ |         |
| H182 | BrCH <sub>2</sub> C(O)OOH → BrCH <sub>2</sub> O <sub>2</sub> + OH                                                                                                         | $J = 7.649 \cdot 10^{-06} \cos(\chi)^{0.682} \exp(-0.279/\cos(\chi))$ |         |
| H183 | BrCH <sub>2</sub> OOH → BrCHO + OH + HO <sub>2</sub>                                                                                                                      | $J = 7.649 \cdot 10^{-06} \cos(\chi)^{0.682} \exp(-0.279/\cos(\chi))$ |         |
| H184 | BrCHO → HO <sub>2</sub> + CO + Br                                                                                                                                         | $J = 4.642 \cdot 10^{-05} \cos(\chi)^{0.762} \exp(-0.353/\cos(\chi))$ |         |
| H185 | CH <sub>3</sub> COCH <sub>2</sub> Br → 0.7 CO + 0.7 Br + 0.7 CH <sub>3</sub> CO <sub>3</sub> + 0.3 BrCH <sub>2</sub> CO <sub>3</sub> + 0.3 CH <sub>3</sub> O <sub>2</sub> | $J = 3.523 \cdot 10^{-04} \cos(\chi)^{0.885} \exp(-0.283/\cos(\chi))$ |         |
| H186 | CH <sub>3</sub> COC(O)Br → CO + Br + CH <sub>3</sub> CO <sub>3</sub>                                                                                                      | $J = 1.853 \cdot 10^{-04} \cos(\chi)^{0.583} \exp(-0.225/\cos(\chi))$ |         |
| H187 | CHBr <sub>3</sub> → 3 Br + CO + HO <sub>2</sub>                                                                                                                           | $J = 2.228 \cdot 10^{-06} \cos(\chi)^{1.471} \exp(-0.230/\cos(\chi))$ |         |
| H188 | I <sub>2</sub> → I + I                                                                                                                                                    | $J = 2.165 \cdot 10^{-01} \cos(\chi)^{0.125} \exp(-0.185/\cos(\chi))$ |         |
| H189 | IO → I + O( <sup>3</sup> P)                                                                                                                                               | $J = 2.640 \cdot 10^{-03} \cos(\chi)^{0.240} \exp(-0.240/\cos(\chi))$ |         |
| H190 | OIO → 0.96 I + 0.04 IO + 0.04 O( <sup>3</sup> P)                                                                                                                          | $J = 4.054 \cdot 10^{-02} \cos(\chi)^{0.119} \exp(-0.185/\cos(\chi))$ |         |
| H191 | HOI → I + OH                                                                                                                                                              | $J = 1.469 \cdot 10^{-02} \cos(\chi)^{0.342} \exp(-0.236/\cos(\chi))$ |         |
| H192 | INO <sub>3</sub> → 0.85 I + 0.85 NO <sub>3</sub> + 0.15 IO + 0.15 NO <sub>2</sub>                                                                                         | $J = 6.599 \cdot 10^{-02} \cos(\chi)^{0.530} \exp(-0.243/\cos(\chi))$ |         |
| H193 | ICl → I + Cl                                                                                                                                                              | $J = 3.403 \cdot 10^{-02} \cos(\chi)^{0.179} \exp(-0.207/\cos(\chi))$ |         |
| H194 | IBr → I + Br                                                                                                                                                              | $J = 1.000 \cdot 10^{-01} \cos(\chi)^{0.149} \exp(-0.197/\cos(\chi))$ |         |
| H195 | C <sub>3</sub> H <sub>7</sub> I → I + C <sub>3</sub> H <sub>7</sub> O <sub>2</sub>                                                                                        | $J = 3.731 \cdot 10^{-05} \cos(\chi)^{1.292} \exp(-0.217/\cos(\chi))$ |         |
| H196 | CH <sub>2</sub> I <sub>2</sub> → 2 I + 2 HO <sub>2</sub>                                                                                                                  | $J = 1.496 \cdot 10^{-02} \cos(\chi)^{0.801} \exp(-0.265/\cos(\chi))$ |         |
| H197 | CH <sub>3</sub> I → I + CH <sub>3</sub> O <sub>2</sub>                                                                                                                    | $J = 1.206 \cdot 10^{-05} \cos(\chi)^{1.254} \exp(-0.231/\cos(\chi))$ |         |
| H198 | ClCH <sub>2</sub> I → I + ClCH <sub>2</sub> O <sub>2</sub>                                                                                                                | $J = 6.910 \cdot 10^{-04} \cos(\chi)^{1.057} \exp(-0.238/\cos(\chi))$ |         |

| Nr.                                                                                                                                          | Reaction                                                   | Rate constant <sup>(a)</sup>                                          | Comment |
|----------------------------------------------------------------------------------------------------------------------------------------------|------------------------------------------------------------|-----------------------------------------------------------------------|---------|
| H199                                                                                                                                         | BrCH <sub>2</sub> I → I + BrCH <sub>2</sub> O <sub>2</sub> | $J = 4.261 \cdot 10^{-04} \cos(\chi)^{0.976} \exp(-0.250/\cos(\chi))$ |         |
| (a) k <sup>2nd</sup> in cm <sup>3</sup> molecules <sup>-1</sup> s <sup>-1</sup> ; k <sup>1st</sup> in s <sup>-1</sup> ; J in s <sup>-1</sup> |                                                            |                                                                       |         |

**Table S7 Parameters for pressure dependent reactions.**

| Reaction                                                                                                                 | TYPE | k <sub>0</sub> <sup>(a)</sup>          | k <sub>∞</sub> <sup>(a)</sup>          | F <sub>C</sub> |
|--------------------------------------------------------------------------------------------------------------------------|------|----------------------------------------|----------------------------------------|----------------|
| H5 Cl + NO <sub>2</sub> → ClNO <sub>2</sub>                                                                              | TROE | $1.80 \cdot 10^{-31} * (T/298)^{-2.0}$ | $1.00 \cdot 10^{-10} * (T/298)^{-1.0}$ | 0.6            |
| H6 ClO + NO <sub>2</sub> → ClNO <sub>3</sub>                                                                             | TROE | $1.60 \cdot 10^{-31} * (T/298)^{-3.4}$ | $7.00 \cdot 10^{-11}$                  | 0.4            |
| H44 Cl + C <sub>2</sub> H <sub>2</sub> → 0.26 ClCHO + 0.21 Cl + 0.53 HCl + 0.21 GLYOXAL + 1.32 CO + 0.79 HO <sub>2</sub> | TROE | $6.10 \cdot 10^{-30} * (T/298)^{-3.0}$ | $2.00 \cdot 10^{-10}$                  | 0.6            |
| H45 Cl + C <sub>2</sub> H <sub>4</sub> → ClCH <sub>2</sub> CH <sub>2</sub> O <sub>2</sub>                                | TROE | $1.85 \cdot 10^{-29} * (T/298)^{-3.3}$ | $6.00 \cdot 10^{-10}$                  | 0.4            |
| H54 ClCH <sub>2</sub> CO <sub>3</sub> + NO <sub>2</sub> → ClPAN                                                          | TROE | $2.70 \cdot 10^{-28} * (T/298)^{7.1}$  | $1.20 \cdot 10^{-11} * (T/298)^{0.9}$  | 0.3            |
| H60 ClPAN → ClCH <sub>2</sub> CO <sub>3</sub> + NO <sub>2</sub>                                                          | TROE | $4.90 \cdot 10^{-03} \exp(-12100/T)$   | $5.40 \cdot 10^{+16} \exp(-13830/T)$   | 0.3            |
| H82 CH <sub>3</sub> CH(Cl)CO <sub>3</sub> + NO <sub>2</sub> → CH <sub>3</sub> ClPAN                                      | TROE | $2.70 \cdot 10^{-28} * (T/298)^{7.1}$  | $1.20 \cdot 10^{-11} * (T/298)^{0.9}$  | 0.3            |
| H83 CH <sub>3</sub> ClPAN → CH <sub>3</sub> CH(Cl)CO <sub>3</sub> + NO <sub>2</sub>                                      | TROE | $4.90 \cdot 10^{-03} \exp(-12100/T)$   | $5.40 \cdot 10^{+16} \exp(-13830/T)$   | 0.3            |
| H102 Br + NO <sub>2</sub> → BrNO <sub>2</sub>                                                                            | TROE | $4.20 \cdot 10^{-31} * (T/298)^{-2.4}$ | $2.70 \cdot 10^{-11}$                  | 0.55           |
| H104 BrO + NO <sub>2</sub> → BrNO <sub>3</sub>                                                                           | TROE | $4.70 \cdot 10^{-31} * (T/298)^{-3.1}$ | $1.80 \cdot 10^{-11}$                  | 0.4            |
| H151 IO + NO <sub>2</sub> → IONO <sub>2</sub>                                                                            | TROE | $7.70 \cdot 10^{-31} (T/300)^{-5.0}$   | $1.60 \cdot 10^{-11}$                  | 0.6            |
| (a) k <sup>2nd</sup> in cm <sup>3</sup> molecules <sup>-1</sup> s <sup>-1</sup> ; k <sup>1st</sup> in s <sup>-1</sup>    |      |                                        |                                        |                |

Rate constants calculated with TROE formula:  $k(T) = \frac{k_0(T)[M]}{1 + \frac{k_0(T)[M]}{k_\infty(T)}} \times F_C \left\{ 1 + \log_{10} \left( \frac{k_0(T)[M]}{k_\infty(T)} \right)^2 \right\}^{-1}$

**Table S8** Implemented phase transfers in the CAPRAM-HM3.0red

② reactions that run in the cloud mode 'sub#1', ③ reactions that run in the aerosol mode 'sub#2', ● already included in CAPRAM3.0red

|      | Species                           | $K_H$ (298 K) <sup>(a)</sup> | $-\Delta H/R$ <sup>(b)</sup> | $\alpha$ | $D_g$ (298 K) <sup>(c)</sup> | Comment |
|------|-----------------------------------|------------------------------|------------------------------|----------|------------------------------|---------|
| H200 | ● Cl <sub>2</sub>                 | $9.15 \cdot 10^{-2}$         | 2490                         | 0.08     | 1.28                         |         |
| H201 | Cl                                | $2.00 \cdot 10^{-1}$         |                              | 0.05     | 1.82                         |         |
| H202 | ● HCl                             | $1.10 \cdot 10^0$            | 2020                         | 0.1026   | 1.89                         |         |
| H203 | ③ HOCl                            | $6.60 \cdot 10^2$            | 5862                         | 0.5      | 1.51                         |         |
| H204 | ● ClNO <sub>2</sub>               | $2.40 \cdot 10^{-2}$         |                              | 0.01     | 1.27                         |         |
| H205 | ③ ClNO <sub>3</sub>               | $2.10 \cdot 10^5$            | 8700                         | 0.1      | 1.18                         |         |
| H206 | ClCHO                             | $3.00 \cdot 10^3$            | 7216                         | 0.02     | 1.23                         |         |
| H207 | ● Br <sub>2</sub>                 | $7.60 \cdot 10^{-1}$         | 4100                         | 0.08     | 1.00                         |         |
| H208 | Br                                | $1.20 \cdot 10^0$            |                              | 0.05     | 1.29                         |         |
| H209 | ③ HBr                             | $1.30 \cdot 10^0$            | 10239                        | 0.0481   | 1.26                         |         |
| H210 | ③ HOBr                            | $9.30 \cdot 10^1$            | 5862                         | 0.5      | 1.16                         |         |
| H211 | ③ BrNO <sub>3</sub>               | $2.10 \cdot 10^5$            | 8700                         | 0.8      | 1.01                         |         |
| H212 | ③ BrCl                            | $9.40 \cdot 10^{-1}$         | -5600                        | 0.33     | 1.05                         |         |
| H213 | BrCH <sub>2</sub> CO <sub>3</sub> | $6.69 \cdot 10^2$            | 5893                         | 0.019    | 0.84                         |         |
| H214 | ② BrCH <sub>2</sub> COOH          | $1.52 \cdot 10^5$            | 9300                         | 0.0322   | 0.84                         |         |
| H215 | BrCHO                             | $7.40 \cdot 10^1$            |                              | 0.02     | 1.02                         |         |
| H216 | I <sub>2</sub>                    | $3.00 \cdot 10^0$            | 4431                         | 0.0126   | 0.86                         |         |
| H217 | ③ HOI                             | $4.50 \cdot 10^2$            | 5862                         | 0.5      | 1.08                         |         |
| H218 | HIO <sub>3</sub>                  | $2.10 \cdot 10^5$            | 8700                         | 0.0126   | 0.98                         |         |
| H219 | ③ INO <sub>3</sub>                | $2.10 \cdot 10^5$            | 8700                         | 0.123    | 0.96                         |         |
| H220 | ③ I <sub>2</sub> O <sub>2</sub>   | $1.00 \cdot 10^4$            |                              | 0.123    | 0.80                         |         |
| H221 | ③ ICl                             | $1.10 \cdot 10^2$            | 5600                         | 0.0126   | 0.98                         |         |
| H222 | ③ IBr                             | $2.40 \cdot 10^1$            | 5600                         | 0.0126   | 0.88                         |         |

(a) in M atm<sup>-1</sup>; (b) in K; (c) in m<sup>2</sup> s<sup>-1</sup>



**Table S9** Implemented aqueous-phase reactions in the CAPRAM-HM3.0red

| ② reactions that run in the cloud mode 'sub#1', ③ reactions that run in the aerosol mode 'sub#2', ● already included in CAPRAM3.0red |                                                                                                                     |                      |         |  |
|--------------------------------------------------------------------------------------------------------------------------------------|---------------------------------------------------------------------------------------------------------------------|----------------------|---------|--|
| Reaction                                                                                                                             | $k_{298}^{(a)}$                                                                                                     | $E_A/R^{(b)}$        | Comment |  |
| H223●                                                                                                                                | $\text{Cl}_2^- + \text{H}_2\text{O}_2 \rightarrow 2 \text{Cl}^- + \text{H}^+ + \text{HO}_2$                         | $6.20 \cdot 10^5$    | 3340    |  |
| H224②●                                                                                                                               | $\text{Cl}_2^- + \text{H}_2\text{O} \rightarrow \text{H}^+ + \text{Cl}^- + \text{ClOH}^-$                           | $2.34 \cdot 10^1$    |         |  |
| H225②                                                                                                                                | $\text{HOCl} + \text{HO}_2 \rightarrow \text{Cl} + \text{H}_2\text{O} + \text{O}_2$                                 | $7.50 \cdot 10^6$    |         |  |
| H226                                                                                                                                 | $\text{HOCl} + \text{OH} \rightarrow \text{ClO} + \text{H}_2\text{O}$                                               | $2.00 \cdot 10^9$    |         |  |
| H227●                                                                                                                                | $\text{Cl}_2^- + \text{HSO}_3^- \rightarrow 2 \text{Cl}^- + \text{H}^+ + \text{SO}_3^-$                             | $1.70 \cdot 10^8$    | 400     |  |
| H228③                                                                                                                                | $\text{HOCl} + \text{HSO}_3^- \rightarrow \text{Cl}^- + \text{H}^+ + \text{HSO}_4^{2-}$                             | $7.60 \cdot 10^8$    |         |  |
| H229                                                                                                                                 | $\text{Cl}^- + \text{HSO}_5^- \rightarrow \text{HOCl} + \text{SO}_4^{2-}$                                           | $1.80 \cdot 10^{-3}$ | 7352    |  |
| H230●                                                                                                                                | $\text{Cl}_2^- + \text{Fe}_2^+ \rightarrow 2 \text{Cl}^- + \text{Fe}_3^+$                                           | $1.00 \cdot 10^7$    | 3030    |  |
| H231②●                                                                                                                               | $\text{Cl}^- + \text{FeO}_2^+ \rightarrow \text{Fe}_3^+ + \text{ClOH}^- + \text{OH}^- - \text{H}_2\text{O}$         | $1.00 \cdot 10^2$    |         |  |
| H232●                                                                                                                                | $\text{Cl}_2^- + \text{Mn}_2^+ \rightarrow \text{MnCl}_2^+$                                                         | $2.00 \cdot 10^7$    | 4090    |  |
| H233●                                                                                                                                | $\text{MnCl}_2^+ \rightarrow 0.588 \text{Cl}_2^- + 0.588 \text{Mn}^{2+} + 0.824 \text{Cl}^- + 0.412 \text{Mn}^{3+}$ | $5.10 \cdot 10^5$    |         |  |
| H234                                                                                                                                 | $2 \text{ClO} \rightarrow \text{Cl}^- + \text{ClO}_3^- + 2 \text{H}^+$                                              | $2.50 \cdot 10^9$    |         |  |
| H235                                                                                                                                 | $\text{OH} + \text{ClO}_3^- \rightarrow \text{ClO} + \text{O}_2 + \text{OH}^-$                                      | $1.00 \cdot 10^6$    |         |  |
| H236                                                                                                                                 | $\text{Cl}_2 + \text{H}_2\text{O}_2 \rightarrow 2 \text{H}^+ + 2 \text{Cl}^- + \text{O}_2$                          | $1.83 \cdot 10^2$    | 5387    |  |
| H237③                                                                                                                                | $\text{ClNO}_3 \rightarrow \text{HOCl} + \text{HNO}_3$                                                              | $1.62 \cdot 10^6$    | 2800    |  |
| H238②                                                                                                                                | $\text{Cl}_2^- + \text{HC}_2\text{O}_4^- \rightarrow 2 \text{Cl}^- + \text{H}^+ + \text{C}_2\text{O}_4^-$           | $1.30 \cdot 10^6$    |         |  |
| H239②                                                                                                                                | $\text{Cl}_2^- + \text{C}_2\text{O}_4^{2-} \rightarrow 2 \text{Cl}^- + \text{C}_2\text{O}_4^-$                      | $4.00 \cdot 10^6$    |         |  |
| H240②                                                                                                                                | $\text{ClCHO} \rightarrow \text{CO} + \text{H}^+ + \text{Cl}^-$                                                     | $1.00 \cdot 10^4$    |         |  |
| H241                                                                                                                                 | $\text{Br} + \text{H}_2\text{O}_2 \rightarrow \text{H}^+ + \text{Br}^- + \text{HO}_2$                               | $4.00 \cdot 10^9$    |         |  |
| H242②                                                                                                                                | $\text{Br}_2^- + \text{HO}_2 \rightarrow \text{Br}^- + 0.5 \text{Br}_2 + 0.5 \text{H}_2\text{O}_2 + 0.5 \text{O}_2$ | $8.80 \cdot 10^9$    |         |  |
| H243                                                                                                                                 | $\text{BrO} + \text{BrO} \rightarrow \text{BrO}_2^- + \text{HOBr} + \text{H}^+$                                     | $2.80 \cdot 10^9$    |         |  |
| H244                                                                                                                                 | $\text{HOBr} + \text{OH} \rightarrow \text{BrO} + \text{H}_2\text{O}$                                               | $2.00 \cdot 10^9$    |         |  |
| H245②                                                                                                                                | $\text{HOBr} + \text{HO}_2 \rightarrow \text{Br} + \text{H}_2\text{O} + \text{O}_2$                                 | $1.00 \cdot 10^9$    |         |  |
| H246②                                                                                                                                | $\text{HOBr} + \text{H}_2\text{O}_2 \rightarrow \text{H}^+ + \text{Br}^- + \text{H}_2\text{O} + \text{O}_2$         | $3.50 \cdot 10^6$    |         |  |
| H247③                                                                                                                                | $\text{HOBr} + \text{HSO}_3^- \rightarrow \text{H}^+ + \text{Br}^- + \text{HSO}_4^-$                                | $5.00 \cdot 10^9$    |         |  |
| H248                                                                                                                                 | $\text{Br}^- + \text{HSO}_5^- \rightarrow \text{HOBr} + \text{SO}_4^{2-}$                                           | $1.00 \cdot 10^0$    | 5338    |  |

② reactions that run in the cloud mode 'sub#1', ③ reactions that run in the aerosol mode 'sub#2', ● already included in CAPRAM3.0red

| Reaction | $k_{298}^{(a)}$                                                                                                                                                                       | $E_A/R^{(b)}$        | Comment |
|----------|---------------------------------------------------------------------------------------------------------------------------------------------------------------------------------------|----------------------|---------|
| H249     | $\text{Br}^- + \text{NO}_3 \rightarrow \text{Br} + \text{NO}_3^-$                                                                                                                     | $3.80 \cdot 10^9$    |         |
| H250     | $\text{Br}_2^- + \text{Fe}^{2+} \rightarrow 2 \text{Br}^- + \text{Fe}^{3+}$                                                                                                           | $3.60 \cdot 10^6$    | 3330    |
| H251●    | $\text{Br}_2^- + \text{Mn}^{2+} \rightarrow \text{MnBr}_2^+$                                                                                                                          | $6.30 \cdot 10^6$    | 4330    |
| H252●    | $\text{MnBr}_2^+ \rightarrow 0.577 \text{Br}_2^- + 0.577 \text{Mn}^{2+} + 0.846 \text{Br}^- + 0.423 \text{Mn}^{3+}$                                                                   | $5.20 \cdot 10^5$    |         |
| H253     | $\text{BrO}_3^- + \text{SO}_4^- \rightarrow \text{BrO} + \text{O}_2 + \text{SO}_4^{2-}$                                                                                               | $1.40 \cdot 10^6$    |         |
| H254     | $\text{Br} + \text{O}_3 \rightarrow \text{BrO} + \text{O}_2$                                                                                                                          | $1.50 \cdot 10^8$    |         |
| H255     | $\text{BrO}_3^- + \text{HSO}_3^- \rightarrow \text{BrO}_2^- + \text{SO}_4^{2-} + \text{H}^+$                                                                                          | $2.70 \cdot 10^{-2}$ |         |
| H256     | $\text{BrO}_3^- + \text{OH} \rightarrow \text{BrO} + \text{O}_2 + \text{OH}^-$                                                                                                        | $5.00 \cdot 10^6$    |         |
| H257③    | $\text{BrNO}_3 \rightarrow \text{HOBr} + \text{HNO}_3$                                                                                                                                | $1.00 \cdot 10^9$    |         |
| H258     | $\text{BrO}_3^- + \text{HC}_2\text{O}_4^- \rightarrow \text{BrO}_2^- + 2 \text{CO}_2 + \text{H}_2\text{O}$                                                                            | $7.47 \cdot 10^{-4}$ |         |
| H259②    | $\text{BrCHO} \rightarrow \text{CO} + \text{H}^+ + \text{Br}^-$                                                                                                                       | $1.00 \cdot 10^4$    |         |
| H260②    | $\text{CH}_2\text{BrCO}_3 + \text{H}_2\text{O} \rightarrow \text{CH}_2\text{BrCOOH} + \text{HO}_2$                                                                                    | $3.55 \cdot 10^5$    |         |
| H261     | $\text{Br}_2^- + \text{HCOO}^- \rightarrow 2 \text{Br}^- + \text{COOH}$                                                                                                               | $4.90 \cdot 10^3$    |         |
| H262③    | $\text{Br}^- + \text{HOCl} \rightarrow \text{BrCl} + \text{H}_2\text{O} - \text{H}^+$                                                                                                 | $1.30 \cdot 10^6$    |         |
| H263②    | $\text{BrO}_2^- + \text{HOCl} \rightarrow 0.85 \text{ClO}_3^- + 0.93 \text{HOBr} + 0.08 \text{ClO}_2^- + 0.07 \text{BrO}_3^- + 0.92 \text{Cl}^- + 0.92 \text{H}^+ - 0.85 \text{HOCl}$ | $1.60 \cdot 10^2$    |         |
| H264     | $\text{I}^- + \text{O}_3 \rightarrow \text{HOI} + \text{O}_2$                                                                                                                         | $2.17 \cdot 10^9$    | 8790    |
| H265②    | $\text{IO} + \text{IO} \rightarrow \text{HOI} + \text{HIO}_3 + \text{H}^+ - \text{H}_2\text{O} - \text{H}_2\text{O}_2$                                                                | $1.50 \cdot 10^9$    |         |
| H266③    | $\text{HOI} + \text{HSO}_3^- \rightarrow \text{H}^+ + \text{I}^- + \text{HSO}_4^-$                                                                                                    | $5.00 \cdot 10^9$    |         |
| H267     | $\text{HOI} + \text{OH} \rightarrow \text{IO} + \text{H}_2\text{O}$                                                                                                                   | $7.00 \cdot 10^9$    |         |
| H268③    | $\text{INO}_3 \rightarrow \text{HOI} + \text{HNO}_3$                                                                                                                                  | $1.62 \cdot 10^6$    | 2800    |
| H269     | $\text{I}_2\text{O}_2 + \text{H}^+ \rightarrow \text{HIO}_3 + \text{HOI} + \text{H}^+$                                                                                                | $3.20 \cdot 10^4$    |         |
| H270     | $\text{IO}_3^- + \text{OH} \rightarrow \text{IO} + \text{O}_2 + \text{OH}^-$                                                                                                          | $1.08 \cdot 10^5$    |         |

(a)  $k_{298}^{2\text{nd}}$  in  $\text{l}^1 \text{mol}^{-1} \text{s}^{-1}$ ;  $k_{298}^{1\text{st}}$  in  $\text{s}^{-1}$ ; (b) in K

**Table S10** Implemented aqueous-phase equilibrium reactions in the CAPRAM-HM3.0red

Ⓜ reactions that run in the cloud mode 'sub#1', Ⓝ reactions that run in the aerosol mode 'sub#2', • already included in CAPRAM3.0red

| Reaction | $K^{(a)}$                                                          | $k_f, 298^{(b)}$                  | $E_A/R^{(c)}$        | $k_b, 298^{(b)}$ | $E_A/R^{(c)}$        | Comment |
|----------|--------------------------------------------------------------------|-----------------------------------|----------------------|------------------|----------------------|---------|
| H271Ⓜ•   | $Cl + Cl^- \rightleftharpoons Cl_2^-$                              | $1.4 \cdot 10^5$                  | $8.50 \cdot 10^9$    |                  | $6.00 \cdot 10^4$    |         |
| H272Ⓝ•   | $Cl_2 + H_2O \rightleftharpoons H^+ + Cl^- + HOCl$                 | $1.90 \cdot 10^{-5} e^{-4500/T}$  | $4.00 \cdot 10^{-1}$ | 8000             | $2.10 \cdot 10^4$    | 3500    |
| H273Ⓝ•   | $HCl \rightleftharpoons H^+ + Cl^-$                                | $1.72 \cdot 10^6 e^{6890/T}$      | $5.00 \cdot 10^{11}$ | -6890            | $2.90 \cdot 10^5$    |         |
| H274Ⓜ•   | $Cl^- + OH \rightleftharpoons ClOH^-$                              | $7.00 \cdot 10^{-1}$              | $4.30 \cdot 10^9$    |                  | $6.10 \cdot 10^9$    |         |
| H275Ⓜ    | $Cl + OH^- \rightleftharpoons ClOH^-$                              | $7.83 \cdot 10^8$                 | $1.80 \cdot 10^{10}$ |                  | $2.30 \cdot 10^1$    |         |
| H276Ⓜ•   | $ClOH^- + H^+ \rightleftharpoons Cl + H_2O$                        | $5.10 \cdot 10^6$                 | $2.1 \cdot 10^{10}$  |                  | $4.10 \cdot 10^3$    |         |
| H277Ⓜ•   | $ClOH^- + Cl^- \rightleftharpoons Cl_2^- + OH^-$                   | $2.20 \cdot 10^{-4}$              | $1.00 \cdot 10^4$    |                  | $4.50 \cdot 10^7$    |         |
| H278Ⓜ•   | $Cl^- + SO_4^{2-} \rightleftharpoons Cl + SO_4^{2-}$               | $1.20 \cdot 10^0$                 | $2.52 \cdot 10^8$    |                  | $2.10 \cdot 10^8$    |         |
| H279Ⓜ•   | $Cl^- + NO_3 \rightleftharpoons Cl + NO_3^-$                       | $3.40 \cdot 10^0 e^{-4300/T}$     | $3.40 \cdot 10^8$    | 4300             | $1.00 \cdot 10^8$    |         |
| H280     | $HOCl + NO_2^- \rightleftharpoons ClNO_2 + OH^-$                   | $3.97 \cdot 10^{-4}$              | $1.99 \cdot 10^7$    |                  | $5.00 \cdot 10^{10}$ |         |
| H281Ⓝ    | $Cl_2 + SO_4^{2-} \rightleftharpoons Cl^- + HOCl + HSO_4^-$        | $1.14 \cdot 10^{-3}$              | $3.20 \cdot 10^1$    |                  | $2.80 \cdot 10^3$    |         |
| H282Ⓝ•   | $Cl^- + NO_2^+ \rightleftharpoons ClNO_2$                          | $1.44 \cdot 10^8$                 | $3.90 \cdot 10^{10}$ |                  | $2.70 \cdot 10^2$    |         |
| H283Ⓜ•   | $Br + Br^- \rightleftharpoons Br_2^-$                              | $6.32 \cdot 10^5$                 | $1.20 \cdot 10^{10}$ |                  | $1.90 \cdot 10^4$    |         |
| H284Ⓝ    | $Br_2 + H_2O \rightleftharpoons H^+ + Br^- + HOBr$                 | $1.06 \cdot 10^{-10} e^{-7500/T}$ | $1.70 \cdot 10^0$    | 7500             | $1.60 \cdot 10^{10}$ |         |
| H285Ⓝ    | $HBr \rightleftharpoons H^+ + Br^-$                                | $1.00 \cdot 10^9$                 | $5.00 \cdot 10^{11}$ |                  | $5.00 \cdot 10^2$    |         |
| H286Ⓜ•   | $Br^- + OH \rightleftharpoons BrOH^-$                              | $3.33 \cdot 10^2$                 | $1.10 \cdot 10^{10}$ |                  | $3.30 \cdot 10^7$    |         |
| H287Ⓜ    | $Br + OH^- \rightleftharpoons BrOH^-$                              | $3.10 \cdot 10^3$                 | $1.30 \cdot 10^{10}$ |                  | $4.20 \cdot 10^6$    |         |
| H288Ⓜ•   | $BrOH^- + H^+ \rightleftharpoons Br + H_2O$                        | $1.80 \cdot 10^{12}$              | $4.40 \cdot 10^{10}$ |                  | $2.45 \cdot 10^{-2}$ |         |
| H289Ⓜ•   | $BrOH^- + Br^- \rightleftharpoons Br_2^- + OH^-$                   | $7.00 \cdot 10^1$                 | $1.90 \cdot 10^8$    |                  | $2.70 \cdot 10^6$    |         |
| H290     | $HOBr + HOBr \rightleftharpoons H^+ + Br^- + BrO_2^-$              | $6.70 \cdot 10^{-12}$             | $2.00 \cdot 10^{-5}$ |                  | $3.00 \cdot 10^6$    |         |
| H291     | $HOBr + BrO_2^- \rightleftharpoons H^+ + Br^- + BrO_3^-$           | $1.70 \cdot 10^0$                 | $3.20 \cdot 10^0$    |                  | $2.00 \cdot 10^0$    |         |
| H292Ⓜ    | $CH_2BrCOOH \rightleftharpoons CH_2BrCOO^- + H^+$                  | $1.75 \cdot 10^{-5} e^{46/T}$     | $8.75 \cdot 10^5$    | -46              | $5.00 \cdot 10^{10}$ |         |
| H293Ⓝ    | $Br_2 + SO_4^{2-} + H_2O \rightleftharpoons HOBr + Br^- + HSO_4^-$ | $6.15 \cdot 10^{-6}$              | $2.28 \cdot 10^4$    |                  | $3.70 \cdot 10^9$    |         |
| H294Ⓝ    | $BrCl \rightleftharpoons HOBr + H^+ + Cl^- - H_2O$                 | $1.80 \cdot 10^{-5}$              | $1.00 \cdot 10^5$    |                  | $5.60 \cdot 10^9$    |         |
| H295Ⓝ    | $BrCl \rightleftharpoons Br + Cl$                                  | $1.60 \cdot 10^{-7}$              | $1.90 \cdot 10^3$    |                  | $1.20 \cdot 10^{10}$ |         |
| H296Ⓝ    | $BrCl \rightleftharpoons Br + Cl^-$                                | $6.10 \cdot 10^{-4}$              | $6.10 \cdot 10^4$    |                  | $1.00 \cdot 10^8$    |         |
| H297Ⓝ    | $BrCl + Br^- \rightleftharpoons Br_2^- + Cl^-$                     | $1.86 \cdot 10^3$                 | $8.00 \cdot 10^9$    |                  | $4.30 \cdot 10^6$    |         |

② reactions that run in the cloud mode 'sub#1', ③ reactions that run in the aerosol mode 'sub#2', ● already included in CAPRAM3.0red

|       | Reaction                                                                             | K <sup>(a)</sup>      | k <sub>f, 298</sub> <sup>(b)</sup> | E <sub>A</sub> /R <sup>(c)</sup> | k <sub>b, 298</sub> <sup>(b)</sup> | E <sub>A</sub> /R <sup>(c)</sup> | Comment |
|-------|--------------------------------------------------------------------------------------|-----------------------|------------------------------------|----------------------------------|------------------------------------|----------------------------------|---------|
| H298③ | BrCl <sup>-</sup> + Cl <sup>-</sup> ⇌ Br <sup>-</sup> + Cl <sub>2</sub> <sup>-</sup> | 2.75·10 <sup>-8</sup> | 1.10·10 <sup>2</sup>               |                                  | 4.00·10 <sup>9</sup>               |                                  |         |
| H299③ | Br <sub>2</sub> Cl <sup>-</sup> ⇌ BrCl + Br <sup>-</sup>                             | 5.60·10 <sup>-5</sup> | 4.30·10 <sup>5</sup>               |                                  | 7.70·10 <sup>9</sup>               |                                  |         |
| H300③ | Br <sub>2</sub> Cl <sup>-</sup> ⇌ Br <sub>2</sub> + Cl <sup>-</sup>                  | 7.60·10 <sup>-1</sup> | 3.80·10 <sup>4</sup>               |                                  | 5.00·10 <sup>4</sup>               |                                  |         |
| H301③ | BrCl <sub>2</sub> <sup>-</sup> ⇌ BrCl + Cl <sup>-</sup>                              | 1.70·10 <sup>-1</sup> | 1.70·10 <sup>5</sup>               |                                  | 1.00·10 <sup>6</sup>               |                                  |         |
| H302③ | BrCl <sub>2</sub> <sup>-</sup> ⇌ Br <sup>-</sup> + Cl <sub>2</sub>                   | 1.50·10 <sup>-6</sup> | 9.00·10 <sup>3</sup>               |                                  | 6.00·10 <sup>9</sup>               |                                  |         |
| H303  | I <sub>2</sub> + OH <sup>-</sup> ⇌ I <sub>2</sub> OH <sup>-</sup>                    | 5.00·10 <sup>0</sup>  | 1.00·10 <sup>10</sup>              |                                  | 2.00·10 <sup>9</sup>               |                                  |         |
| H304  | I <sub>2</sub> OH <sup>-</sup> ⇌ HOI + I <sup>-</sup>                                | 8.30·10 <sup>0</sup>  | 2.49·10 <sup>9</sup>               |                                  | 3.00·10 <sup>8</sup>               |                                  |         |
| H305  | HOI + H <sup>+</sup> + I <sup>-</sup> ⇌ I <sub>2</sub> + H <sub>2</sub> O            | 1.47·10 <sup>12</sup> | 4.40·10 <sup>12</sup>              |                                  | 3.00·10 <sup>0</sup>               |                                  |         |
| H306② | HIO <sub>3</sub> ⇌ H <sup>+</sup> + IO <sub>3</sub> <sup>-</sup>                     | 1.70·10 <sup>-1</sup> | 8.50·10 <sup>9</sup>               |                                  | 5.00·10 <sup>10</sup>              |                                  |         |
| H307③ | HOI + H <sup>+</sup> + Cl <sup>-</sup> ⇌ ICl                                         | 1.20·10 <sup>4</sup>  | 2.90·10 <sup>10</sup>              |                                  | 2.40·10 <sup>6</sup>               |                                  |         |
| H308③ | HOI + H <sup>+</sup> + Br <sup>-</sup> ⇌ IBr                                         | 5.10·10 <sup>6</sup>  | 4.10·10 <sup>12</sup>              |                                  | 8.00·10 <sup>5</sup>               |                                  |         |
| H309③ | ICl + Br <sup>-</sup> ⇌ IBr + Cl <sup>-</sup>                                        | 3.30·10 <sup>3</sup>  | 1.65·10 <sup>14</sup>              |                                  | 5.00·10 <sup>10</sup>              |                                  |         |

(a) in M<sup>m-n</sup>, n order of reaction of forward reaction, m order of reaction of backward reaction; (b) k<sub>298</sub><sup>2nd</sup> in l<sup>1</sup> mol<sup>-1</sup> s<sup>-1</sup>, k<sub>298</sub><sup>1st</sup> in s<sup>-1</sup>; (c) in K

**Table S11 Measured values of HCl and BrO in marine environments.**

| HCl                          | BrO*                           | Location                 | Comment                               | Reference                |
|------------------------------|--------------------------------|--------------------------|---------------------------------------|--------------------------|
| daily average: 133 – 675 ppt |                                | Bermuda                  |                                       | Keene and Savoie (1999)  |
| range: 30-250 ppt            |                                | Hawaii                   |                                       | Pszenny et al. (2004)    |
| median: 351 ppt              |                                | Appledore Island         |                                       | Keene et al. (2007)      |
| daily median: 82-682 ppt     |                                | North to South Atlantic  |                                       | Keene et al. (2009)      |
| median: 206 ppt              |                                | Cape Verde               | range: 26 – 613 ppt                   | Sander et al. (2013)     |
|                              | max. 1-3.6 ppt                 | Canary Island            | in remote ocean below detection limit | Leser et al. (2003)      |
|                              | average 2.3 ppt                | Mace Head                | Coastal region                        | Saiz-Lopez et al. (2004) |
|                              | average max. $2.5 \pm 1.1$ ppt | Cape Verde               |                                       | Read et al. (2008)       |
|                              | < 0.5 ppt                      | Eastern tropical Pacific | MBL: below detection limit            | Volkamer et al. (2015)   |
|                              | $0.03 \pm 0.26$ ppt            | Western tropical Pacific | clean MBL outflow                     | Chen et al. (2016)       |
|                              | 0.17-1.64 ppt                  | Western Pacific          | between 0.5 – 7 km height             | Le Breton et al. (2017)  |

DL – Detection Limit; \* for a more detailed overview on measurements before 2003 see Sander et al. (2003)

## References

- Burkholder, J. B., Sander, S. P., Abbatt, J., Barker, J. R., Huie, R. E., Kolb, C. E., Kurylo, M. J., Orkin, V. L., Wilmouth, D. M., and Wine, P. H.: Chemical Kinetics and Photochemical Data for Use in Atmospheric Studies, Evaluation No. 18, Jet Propulsion Laboratory, Pasadena, 2015.
- Chen, D., Huey, L. G., Tanner, D. J., Salawitch, R. J., Anderson, D. C., Wales, P. A., Pan, L. L., Atlas, E. L., Hornbrook, R. S., Apel, E. C., Blake, N. J., Campos, T. L., Donets, V., Flocke, F. M., Hall, S. R., Hanisco, T. F., Hills, A. J., Honomichl, S. B., Jensen, J. B., Kaser, L., Montzka, D. D., Nicely, J. M., Reeves, J. M., Riemer, D. D., Schauffler, S. M., Ullmann, K., Weinheimer, A. J., and Wolfe, G. M.: Airborne measurements of BrO and the sum of HOBr and Br<sub>2</sub> over the Tropical West Pacific from 1 to 15 km during the CONvective TRansport of Active Species in the Tropics (CONTRAST) experiment, *J. Geophys. Res.-Atmos.*, 121, 12560-12578, <https://doi.org/10.1002/2016JD025561>, 2016.
- Keene, W. C., and Savoie, D. L.: Correction to “The pH of deliquesced sea-salt aerosol in polluted marine air”, *Geophys. Res. Lett.*, 26, 1315-1316, <https://doi.org/10.1029/1999gl900221>, 1999.
- Keene, W. C., Stutz, J., Pszenny, A. A. P., Maben, J. R., Fischer, E. V., Smith, A. M., von Glasow, R., Pechtl, S., Sive, B. C., and Varner, R. K.: Inorganic chlorine and bromine in coastal New England air during summer, *J. Geophys. Res.-Atmos.*, 112, <https://doi.org/10.1029/2006jd007689>, 2007.
- Keene, W. C., Long, M. S., Pszenny, A. A. P., Sander, R., Maben, J. R., Wall, A. J., O'Halloran, T. L., Kerkweg, A., Fischer, E. V., and Schrems, O.: Latitudinal variation in the multiphase chemical processing of inorganic halogens and related species over the eastern North and South Atlantic Oceans, *Atmos. Chem. Phys.*, 9, 7361-7385, <https://doi.org/10.5194/acp-9-7361-2009>, 2009.
- Le Breton, M., Bannan, T. J., Shallcross, D. E., Khan, M. A., Evans, M. J., Lee, J., Lidster, R., Andrews, S., Carpenter, L. J., Schmidt, J., Jacob, D., Harris, N. R. P., Bauguutte, S., Gallagher, M., Bacak, A., Leather, K. E., and Percival, C. J.: Enhanced ozone loss by active inorganic bromine chemistry in the tropical troposphere, *Atmos. Environ.*, 155, 21-28, <https://doi.org/10.1016/j.atmosenv.2017.02.003>, 2017.
- Leser, H., Hönninger, G., and Platt, U.: MAX-DOAS measurements of BrO and NO<sub>2</sub> in the marine boundary layer, *Geophys. Res. Lett.*, 30, 1537, <https://doi.org/10.1029/2002gl015811>, 2003.
- Pszenny, A. A. P., Moldanov, J., Keene, W. C., Sander, R., Maben, J. R., Martinez, M., Crutzen, P. J., Perner, D., and Prinn, R. G.: Halogen cycling and aerosol pH in the Hawaiian marine boundary layer, *Atmos. Chem. Phys.*, 4, 147-168, <https://doi.org/10.5194/acp-4-147-2004>, 2004.
- Read, K. A., Mahajan, A. S., Carpenter, L. J., Evans, M. J., Faria, B. V., Heard, D. E., Hopkins, J. R., Lee, J. D., Moller, S. J., Lewis, A. C., Mendes, L., McQuaid, J. B., Oetjen, H., Saiz-Lopez, A., Pilling, M. J., and Plane, J. M.: Extensive halogen-mediated ozone destruction over the tropical Atlantic Ocean, *Nature*, 453, 1232-1235, <https://doi.org/10.1038/nature07035>, 2008.
- Saiz-Lopez, A., Plane, J. M. C., and Shillito, J. A.: Bromine oxide in the mid-latitude marine boundary layer, *Geophys. Res. Lett.*, 31, <https://doi.org/10.1029/2003GL018956>, 2004.
- Sander, R., Keene, W. C., Pszenny, A. A. P., Arimoto, R., Ayers, G. P., Baboukas, E., Caine, J. M., Crutzen, P. J., Duce, R. A., Hönninger, G., Huebert, B. J., Maenhaut, W., Mihalopoulos, N., Turekian, V. C., and Van Dingenen, R.: Inorganic bromine in the marine boundary layer: a critical review, *Atmos. Chem. Phys.*, 3, 1301-1336, <https://doi.org/10.5194/acp-3-1301-2003>, 2003.
- Sander, R., Pszenny, A. A. P., Keene, W. C., Crete, E., Deegan, B., Long, M. S., Maben, J. R., and Young, A. H.: Gas phase acid, ammonia and aerosol ionic and trace element concentrations at Cape Verde during the Reactive Halogens in the Marine Boundary Layer (RHAMBLe) 2007 intensive sampling period, *Earth Syst. Sci. Data*, 5, 385-392, <https://doi.org/10.5194/essd-5-385-2013>, 2013.

Volkamer, R., Baidar, S., Campos, T. L., Coburn, S., DiGangi, J. P., Dix, B., Eloranta, E. W., Koenig, T. K., Morley, B., Ortega, I., Pierce, B. R., Reeves, M., Sinreich, R., Wang, S., Zondlo, M. A., and Romashkin, P. A.: Aircraft measurements of BrO, IO, glyoxal, NO<sub>2</sub>, H<sub>2</sub>O, O<sub>2</sub>-O<sub>2</sub> and aerosol extinction profiles in the tropics: comparison with aircraft-/ship-based in situ and lidar measurements, *Atmos. Meas. Tech.*, 8, 2121-2148, <https://doi.org/10.5194/amt-8-2121-2015>, 2015.
